# Supplementary material for: Insights into the nature of ME bonds in [(PMe3)4ME(Mes)]+ (M = Mo, W) and [(PMe3)5WE(Mes)]+: a dispersion-corrected DFT study
Source: Royal Society of Chemistry journal article supplement (doi:10.1039/c3ra47331g), 2014-01-01
Supplement: c3ra47331g.pdf [file c3ra47331g.pdf]

# Insights into the nature of $M\equiv E$ bonds in $[(PMe_3)_4M\equiv E(Mes)]^+$ ( $M = Mo, W$ ) and $[(PMe_3)_5W\equiv E(Mes)]^+$ : A dispersion-corrected DFT study

Krishna K. Pandey\* and Pankaj Patidar

School of Chemical Sciences, Devi Ahilya University Indore, Khandwa Road Campus, Indore 452001, India

## Supporting Information

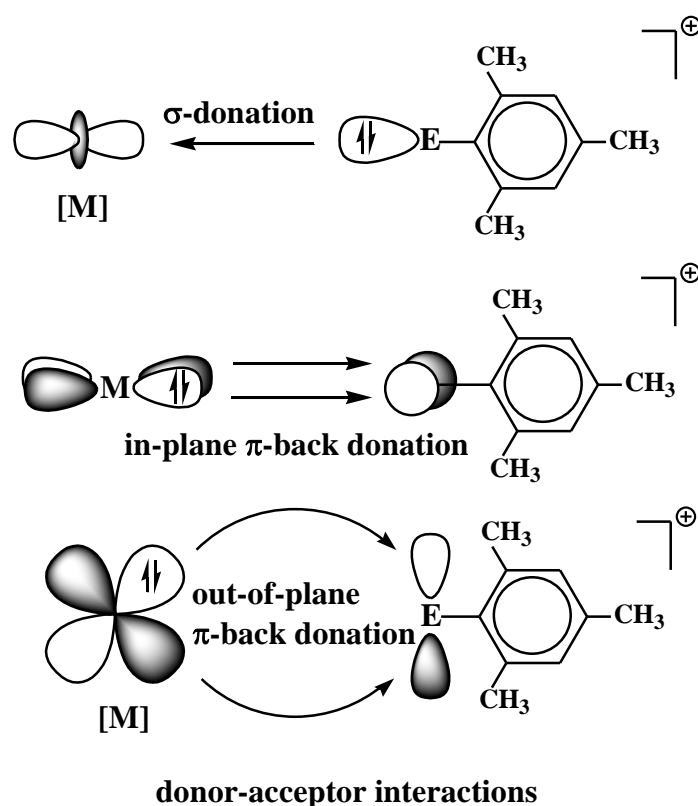

**Fig.S1.** Schematic representation of the orbital interaction between closed shell metal fragments  $[M]$  and group 14 ligand fragments  $[E(Mes)]^+$ .

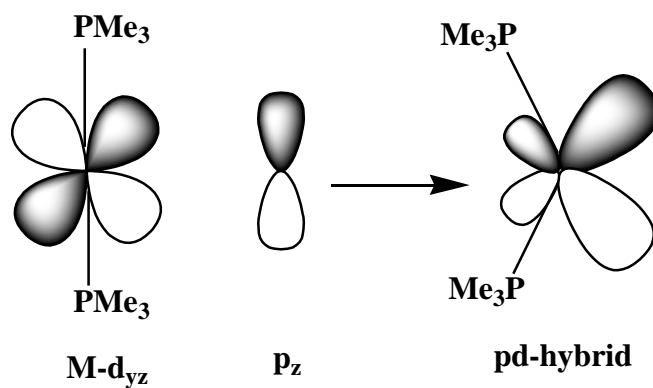

**Fig.S2.** Schematic presentation of the formation of pd hybrid orbital due to the mixing of pure atomic orbitals.

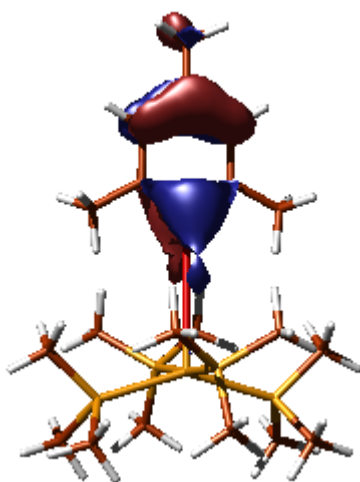

**Fig. S3** Plot of E-C  $\pi$  bonding orbital (HOMO-4) of the cationic molybdenum germylydyne complex, **II**.

**Table S1** Selected optimized structural parameters for cationic transition metal-ylidyne complexes  $[(\text{PMe}_3)_4\text{M}\equiv\text{E}(\text{Mes})]^+$  ( $\text{M} = \text{Mo}, \text{W}$ ) and  $[(\text{PMe}_3)_5\text{W}\equiv\text{E}(\text{Mes})]^+$  using PBE and PW91 functionals.

| Complexes                                                                 | Bond distances |       |       |       | Bond angles |       |
|---------------------------------------------------------------------------|----------------|-------|-------|-------|-------------|-------|
|                                                                           | M-E            |       | E-C   |       | M-E-C       |       |
|                                                                           | PBE            | PW91  | PBE   | PW91  | PBE         | PW91  |
| $[(\text{PMe}_3)_4\text{Mo}\equiv\text{Si}(\text{Mes})]^+$ ( <b>I</b> )   | 2.207          | 2.208 | 1.882 | 1.880 | 178.8       | 180.0 |
| $[(\text{PMe}_3)_4\text{Mo}\equiv\text{Ge}(\text{Mes})]^+$ ( <b>II</b> )  | 2.255          | 2.254 | 1.959 | 1.957 | 178.9       | 179.9 |
| $[(\text{PMe}_3)_4\text{Mo}\equiv\text{Sn}(\text{Mes})]^+$ ( <b>III</b> ) | 2.450          | 2.449 | 2.154 | 2.150 | 178.6       | 179.8 |
| $[(\text{PMe}_3)_4\text{Mo}\equiv\text{Pb}(\text{Mes})]^+$ ( <b>IV</b> )  | 2.507          | 2.504 | 2.229 | 2.230 | 179.5       | 179.6 |
| $[(\text{PMe}_3)_4\text{W}\equiv\text{Si}(\text{Mes})]^+$ ( <b>V</b> )    | 2.224          | 2.224 | 1.880 | 1.876 | 179.4       | 180.0 |
| $[(\text{PMe}_3)_4\text{W}\equiv\text{Ge}(\text{Mes})]^+$ ( <b>VI</b> )   | 2.268          | 2.266 | 1.955 | 1.952 | 179.3       | 179.9 |
| $[(\text{PMe}_3)_4\text{W}\equiv\text{Sn}(\text{Mes})]^+$ ( <b>VII</b> )  | 2.463          | 2.461 | 2.148 | 2.146 | 179.6       | 179.2 |
| $[(\text{PMe}_3)_4\text{W}\equiv\text{Pb}(\text{Mes})]^+$ ( <b>VIII</b> ) | 2.516          | 2.516 | 2.225 | 2.224 | 179.6       | 179.5 |
| $[(\text{PMe}_3)_5\text{W}\equiv\text{Si}(\text{Mes})]^+$ ( <b>IX</b> )   | 2.283          | 2.283 | 1.903 | 1.895 | 171.4       | 171.8 |
| $[(\text{PMe}_3)_5\text{W}\equiv\text{Ge}(\text{Mes})]^+$ ( <b>X</b> )    | 2.329          | 2.326 | 1.981 | 1.976 | 171.5       | 171.6 |
| $[(\text{PMe}_3)_5\text{W}\equiv\text{Sn}(\text{Mes})]^+$ ( <b>XI</b> )   | 2.527          | 2.525 | 2.173 | 2.169 | 172.8       | 172.8 |
| $[(\text{PMe}_3)_5\text{W}\equiv\text{Pb}(\text{Mes})]^+$ ( <b>XII</b> )  | 2.586          | 2.585 | 2.252 | 2.248 | 173.6       | 174.6 |

**Table S2** Results of NBO analysis in cationic transition metal-ylidyne complexes  $[(\text{PMe}_3)_4\text{M}\equiv\text{E}(\text{Mes})]^+$  and  $[(\text{PMe}_3)_5\text{M}\equiv\text{E}(\text{Mes})]^+$  (M = Mo, W; E = Si, Ge, Sn, Pb).

| Complexes                                                                 | Occup. | M    |      |      |      |     | E    |      |       |     |
|---------------------------------------------------------------------------|--------|------|------|------|------|-----|------|------|-------|-----|
|                                                                           |        | %    | %s   | %p   | %d   | %f  | %    | %s   | %p    | %d  |
| <b>M≡E σ-bond</b>                                                         |        |      |      |      |      |     |      |      |       |     |
| $[(\text{PMe}_3)_4\text{Mo}\equiv\text{Si}(\text{Mes})]^+$ ( <b>I</b> )   | 1.841  | 51.4 | 32.8 | 17.9 | 49.3 | 0.0 | 48.6 | 60.0 | 40.0  | 0.0 |
| $[(\text{PMe}_3)_4\text{Mo}\equiv\text{Ge}(\text{Mes})]^+$ ( <b>II</b> )  | 1.825  | 50.3 | 31.5 | 20.1 | 48.3 | 0.1 | 49.7 | 60.3 | 39.7  | 0.0 |
| $[(\text{PMe}_3)_4\text{Mo}\equiv\text{Sn}(\text{Mes})]^+$ ( <b>III</b> ) | 1.787  | 51.5 | 31.4 | 23.5 | 45.1 | 0.0 | 48.5 | 60.0 | 39.9  | 0.1 |
| $[(\text{PMe}_3)_4\text{Mo}\equiv\text{Pb}(\text{Mes})]^+$ ( <b>IV</b> )  | 1.739  | 46.0 | 28.2 | 26.8 | 44.9 | 0.1 | 54.0 | 59.3 | 40.5  | 0.2 |
| $[(\text{PMe}_3)_4\text{W}\equiv\text{Si}(\text{Mes})]^+$ ( <b>V</b> )    | 1.887  | 52.3 | 31.6 | 16.9 | 51.5 | 0.0 | 47.7 | 59.2 | 40.8  | 0.0 |
| $[(\text{PMe}_3)_4\text{W}\equiv\text{Ge}(\text{Mes})]^+$ ( <b>VI</b> )   | 1.871  | 51.5 | 30.4 | 18.8 | 50.8 | 0.0 | 48.5 | 59.5 | 49.5  | 0.0 |
| $[(\text{PMe}_3)_4\text{W}\equiv\text{Sn}(\text{Mes})]^+$ ( <b>VII</b> )  | 1.833  | 53.6 | 29.8 | 21.9 | 48.3 | 0.0 | 46.4 | 59.2 | 40.8  | 0.0 |
| $[(\text{PMe}_3)_4\text{W}\equiv\text{Pb}(\text{Mes})]^+$ ( <b>VIII</b> ) | 1.784  | 48.5 | 26.6 | 24.8 | 48.6 | 0.0 | 51.5 | 58.9 | 40.9  | 0.2 |
| $[(\text{PMe}_3)_5\text{W}\equiv\text{Si}(\text{Mes})]^+$ ( <b>IX</b> )   | 1.791  | 47.7 | 24.3 | 48.2 | 24.5 | 0.0 | 52.3 | 62.8 | 37.2  | 0.0 |
| $[(\text{PMe}_3)_5\text{W}\equiv\text{Ge}(\text{Mes})]^+$ ( <b>X</b> )    | 1.779  | 47.3 | 22.8 | 49.5 | 27.7 | 0.0 | 52.7 | 63.1 | 36.9  | 0.0 |
| $[(\text{PMe}_3)_5\text{W}\equiv\text{Sn}(\text{Mes})]^+$ ( <b>XI</b> )   | 1.728  | 49.8 | 20.9 | 52.8 | 26.3 | 0.0 | 50.2 | 61.9 | 38.0  | 0.1 |
| $[(\text{PMe}_3)_5\text{W}\equiv\text{Pb}(\text{Mes})]^+$ ( <b>XII</b> )  | 1.691  | 44.9 | 18.4 | 53.7 | 27.9 | 0.0 | 55.1 | 61.3 | 38.5  | 0.2 |
| <b>M≡E π-bond (1)</b>                                                     |        |      |      |      |      |     |      |      |       |     |
| $[(\text{PMe}_3)_4\text{Mo}\equiv\text{Si}(\text{Mes})]^+$ ( <b>I</b> )   | 1.759  | 68.9 | 0.0  | 26.1 | 73.8 | 0.0 | 31.1 | 0.0  | 99.7  | 0.3 |
| $[(\text{PMe}_3)_4\text{Mo}\equiv\text{Ge}(\text{Mes})]^+$ ( <b>II</b> )  | 1.750  | 71.2 | 0.0  | 26.5 | 73.5 | 0.0 | 28.8 | 0.0  | 99.9  | 0.1 |
| $[(\text{PMe}_3)_4\text{Mo}\equiv\text{Sn}(\text{Mes})]^+$ ( <b>III</b> ) | 1.738  | 74.1 | 0.0  | 26.7 | 73.3 | 0.0 | 25.9 | 0.0  | 100.0 | 0.0 |
| $[(\text{PMe}_3)_4\text{Mo}\equiv\text{Pb}(\text{Mes})]^+$ ( <b>IV</b> )  | 1.729  | 75.7 | 0.0  | 26.4 | 73.6 | 0.0 | 24.3 | 0.0  | 99.8  | 0.2 |
| $[(\text{PMe}_3)_4\text{W}\equiv\text{Si}(\text{Mes})]^+$ ( <b>V</b> )    | 1.764  | 66.8 | 0.0  | 26.8 | 73.2 | 0.0 | 33.1 | 0.0  | 99.8  | 0.2 |
| $[(\text{PMe}_3)_4\text{W}\equiv\text{Ge}(\text{Mes})]^+$ ( <b>VI</b> )   | 1.755  | 69.3 | 0.0  | 27.1 | 72.8 | 0.0 | 30.6 | 0.0  | 99.9  | 0.1 |
| $[(\text{PMe}_3)_4\text{W}\equiv\text{Sn}(\text{Mes})]^+$ ( <b>VII</b> )  | 1.736  | 72.5 | 0.0  | 27.7 | 72.3 | 0.0 | 27.5 | 0.0  | 100.0 | 0.0 |
| $[(\text{PMe}_3)_4\text{W}\equiv\text{Pb}(\text{Mes})]^+$ ( <b>VIII</b> ) | 1.726  | 74.3 | 0.0  | 27.3 | 72.7 | 0.0 | 25.6 | 0.0  | 99.8  | 0.2 |
| $[(\text{PMe}_3)_5\text{W}\equiv\text{Si}(\text{Mes})]^+$ ( <b>IX</b> )   | 1.835  | 75.0 | 0.0  | 12.3 | 87.7 | 0.0 | 25.0 | 0.0  | 99.8  | 0.2 |
| $[(\text{PMe}_3)_5\text{W}\equiv\text{Ge}(\text{Mes})]^+$ ( <b>X</b> )    | 1.824  | 77.2 | 0.0  | 12.1 | 87.9 | 0.0 | 22.8 | 0.0  | 99.9  | 0.1 |
| $[(\text{PMe}_3)_5\text{W}\equiv\text{Sn}(\text{Mes})]^+$ ( <b>XI</b> )   | 1.812  | 80.6 | 0.0  | 10.6 | 89.4 | 0.0 | 19.4 | 0.0  | 99.9  | 0.1 |
| $[(\text{PMe}_3)_5\text{W}\equiv\text{Pb}(\text{Mes})]^+$ ( <b>XII</b> )  | 1.805  | 82.3 | 0.0  | 9.5  | 90.5 | 0.0 | 17.7 | 0.0  | 99.7  | 0.3 |
| <b>M≡E π-bond (2)</b>                                                     |        |      |      |      |      |     |      |      |       |     |
| $[(\text{PMe}_3)_4\text{Mo}\equiv\text{Si}(\text{Mes})]^+$ ( <b>I</b> )   | 1.834  | 77.1 | 0.0  | 7.0  | 93.0 | 0.0 | 22.9 | 0.0  | 99.6  | 0.4 |
| $[(\text{PMe}_3)_4\text{Mo}\equiv\text{Ge}(\text{Mes})]^+$ ( <b>II</b> )  | 1.831  | 78.6 | 0.0  | 7.2  | 92.8 | 0.0 | 21.4 | 0.0  | 99.8  | 0.2 |
| $[(\text{PMe}_3)_4\text{Mo}\equiv\text{Sn}(\text{Mes})]^+$ ( <b>III</b> ) | 1.827  | 80.7 | 0.0  | 7.1  | 92.9 | 0.0 | 19.3 | 0.0  | 100.0 | 0.0 |
| $[(\text{PMe}_3)_4\text{Mo}\equiv\text{Pb}(\text{Mes})]^+$ ( <b>IV</b> )  | 1.825  | 82.0 | 0.0  | 7.1  | 92.9 | 0.0 | 18.0 | 0.0  | 99.8  | 0.2 |
| $[(\text{PMe}_3)_4\text{W}\equiv\text{Si}(\text{Mes})]^+$ ( <b>V</b> )    | 1.826  | 75.9 | 0.0  | 5.8  | 94.2 | 0.0 | 24.1 | 0.0  | 99.6  | 0.4 |
| $[(\text{PMe}_3)_4\text{W}\equiv\text{Ge}(\text{Mes})]^+$ ( <b>VI</b> )   | 1.823  | 77.6 | 0.0  | 5.9  | 94.1 | 0.0 | 22.4 | 0.0  | 99.8  | 0.2 |
| $[(\text{PMe}_3)_4\text{W}\equiv\text{Sn}(\text{Mes})]^+$ ( <b>VII</b> )  | 1.816  | 80.0 | 0.0  | 5.8  | 94.2 | 0.0 | 20.0 | 0.0  | 100.0 | 0.0 |
| $[(\text{PMe}_3)_4\text{W}\equiv\text{Pb}(\text{Mes})]^+$ ( <b>VIII</b> ) | 1.814  | 81.4 | 0.0  | 5.8  | 94.2 | 0.0 | 18.6 | 0.0  | 99.8  | 0.2 |
| $[(\text{PMe}_3)_5\text{W}\equiv\text{Si}(\text{Mes})]^+$ ( <b>IX</b> )   | 1.879  | 77.2 | 0.3  | 2.7  | 97.0 | 0.0 | 22.8 | 0.1  | 99.6  | 0.3 |
| $[(\text{PMe}_3)_5\text{W}\equiv\text{Ge}(\text{Mes})]^+$ ( <b>X</b> )    | 1.814  | 79.0 | 0.3  | 2.5  | 97.2 | 0.0 | 21.0 | 0.1  | 99.8  | 0.1 |
| $[(\text{PMe}_3)_5\text{W}\equiv\text{Sn}(\text{Mes})]^+$ ( <b>XI</b> )   | 1.806  | 81.2 | 0.2  | 1.7  | 98.1 | 0.0 | 18.8 | 0.1  | 99.9  | 0.0 |
| $[(\text{PMe}_3)_5\text{W}\equiv\text{Pb}(\text{Mes})]^+$ ( <b>XII</b> )  | 1.806  | 82.5 | 0.1  | 1.4  | 98.5 | 0.0 | 17.5 | 0.1  | 99.7  | 0.2 |

**Table S3** Important frontier orbitals, their energies and percentage contribution of major atomic orbitals of transition metal and heavier carbyne element E of the complexes  $[(\text{PMe}_3)_4\text{M}\equiv\text{E}(\text{Mes})]^+$  (M = Mo, W; E = Si, Ge, Sn, Pb).

| Complex                                                                   | M.O.            | Energy (eV) | Type of M.O.  | Contribution of transition metal        | Contribution of E   |
|---------------------------------------------------------------------------|-----------------|-------------|---------------|-----------------------------------------|---------------------|
| $[(\text{PMe}_3)_4\text{Mo}\equiv\text{Si}(\text{Mes})]^+$ ( <b>I</b> )   | $\pi$ ( $a'$ )  | -7.255      | (HOMO-1); AA  | Mo: 54.2% ( $d_{xy}$ )                  | Si:15.9% ( $p_x$ )  |
|                                                                           | $\pi$ ( $a''$ ) | -7.298      | (HOMO-2); AAA | Mo: 45.6% ( $d_{yz}$ ), 4.3% ( $p_z$ )  | Si: 29.4% ( $p_z$ ) |
| $[(\text{PMe}_3)_4\text{Mo}\equiv\text{Ge}(\text{Mes})]^+$ ( <b>II</b> )  | $\pi$ ( $a'$ )  | -7.236      | (HOMO-1); AA  | Mo: 53.1% ( $d_{xy}$ ),                 | Ge: 16.3% ( $p_x$ ) |
|                                                                           | $\pi$ ( $a''$ ) | -7.299      | (HOMO-2); AAA | Mo: 45.7% ( $d_{yz}$ ), 2.8% ( $p_z$ )  | Ge: 31.2% ( $p_z$ ) |
| $[(\text{PMe}_3)_4\text{Mo}\equiv\text{Sn}(\text{Mes})]^+$ ( <b>III</b> ) | $\pi$ ( $a'$ )  | -7.133      | (HOMO-1); AA  | Mo: 56.4% ( $d_{xy}$ ),                 | Sn:17.3% ( $p_x$ )  |
|                                                                           | $\pi$ ( $a''$ ) | -7.135      | (HOMO-2); AAA | Mo: 48.6% ( $d_{yz}$ ), 3.8% ( $p_z$ )  | Sn: 29.1% ( $p_z$ ) |
| $[(\text{PMe}_3)_4\text{Mo}\equiv\text{Pb}(\text{Mes})]^+$ ( <b>IV</b> )  | $\pi$ ( $a'$ )  | -7.064      | (HOMO-1); AAA | Mo: 51.6% ( $d_{yz}$ ), 4.4% ( $p_z$ ), | Pb:26.5% ( $p_z$ )  |
|                                                                           | $\pi$ ( $a''$ ) | -7.082      | (HOMO-2); AA  | Mo: 58.4% ( $d_{xy}$ ),                 | Pb: 16.1% ( $p_x$ ) |
| $[(\text{PMe}_3)_4\text{W}\equiv\text{Si}(\text{Mes})]^+$ ( <b>V</b> )    | $\pi$ ( $a'$ )  | -7.144      | (HOMO-1); AA  | W: 51.9% ( $d_{xy}$ ),                  | Si: 17.4% ( $p_x$ ) |
|                                                                           | $\pi$ ( $a''$ ) | -7.146      | (HOMO-2); AAA | W: 42.5% ( $d_{yz}$ ), 2.7% ( $p_z$ )   | Si:32.0% ( $p_z$ )  |
| $[(\text{PMe}_3)_4\text{W}\equiv\text{Ge}(\text{Mes})]^+$ ( <b>VI</b> )   | $\pi$ ( $a'$ )  | -7.135      | (HOMO-1); AA  | W: 50.7% ( $d_{xy}$ ),                  | Ge: 17.8% ( $p_x$ ) |
|                                                                           | $\pi$ ( $a''$ ) | -7.154      | (HOMO-2); AAA | W: 42.3% ( $d_{yz}$ ), 3.3% ( $p_z$ )   | Ge:34.0% ( $p_z$ )  |
| $[(\text{PMe}_3)_4\text{W}\equiv\text{Sn}(\text{Mes})]^+$ ( <b>VII</b> )  | $\pi$ ( $a''$ ) | -7.010      | (HOMO-1); AAA | W: 44.5% ( $d_{yz}$ ), 2.9% ( $p_z$ )   | Sn: 32.0% ( $p_z$ ) |
|                                                                           | $\pi$ ( $a'$ )  | -7.050      | (HOMO-2); AA  | W: 53.4% ( $d_{xy}$ ),                  | Sn: 18.8% ( $p_x$ ) |
| $[(\text{PMe}_3)_4\text{W}\equiv\text{Pb}(\text{Mes})]^+$ ( <b>VIII</b> ) | $\pi$ ( $a''$ ) | -6.937      | (HOMO-1); AAA | W: 48.6% ( $d_{yz}$ ), 2.7% ( $p_z$ )   | Pb:29.4% ( $p_z$ )  |
|                                                                           | $\pi$ ( $a'$ )  | -6.987      | (HOMO-2); AA  | W: 55.2% ( $d_{xy}$ ),                  | Pb: 17.5% ( $p_x$ ) |

Cartesian coordinates of all optimized geometries of the five-coordinated cationic metal ylidene complexes  $[(\text{PMe}_3)_4\text{M}\equiv\text{E}(\text{Mes})]^+$  (M = Mo: E = Si, **I**; E = Ge, **II**; E = Sn, **III**; E = Pb, **IV**; M = W: E = Si, **V**; E = Ge, **VI**; E = Sn, **VII**; E = Pb, **VIII**) and in the six-coordinated cationic transition metal-ylidene complexes having  $\text{PMe}_3$  as a trans ligand  $[(\text{PMe}_3)_5\text{W}\equiv\text{E}(\text{Mes})]^+$  (E = Si, **IX**; E = Ge, **X**; E = Sn, **XI**; E = Pb, **XII**)

$[(\text{PMe}_3)_4\text{Mo}\equiv\text{Si}(\text{Mes})]^+$  (**I**)

BP86/TZ2P

|    |           |           |           |
|----|-----------|-----------|-----------|
| C  | -0.002272 | 2.971940  | 0.000000  |
| C  | 0.003055  | 3.685825  | 1.226282  |
| C  | 0.014380  | 5.081013  | 1.200112  |
| C  | 0.018197  | 5.801036  | 0.000000  |
| C  | 0.014380  | 5.081013  | -1.200112 |
| C  | 0.003055  | 3.685825  | -1.226282 |
| C  | -0.000487 | 2.987005  | 2.562838  |
| C  | 0.000920  | 7.307236  | 0.000000  |
| C  | -0.000487 | 2.987005  | -2.562838 |
| Si | -0.003515 | 1.089565  | 0.000000  |
| Mo | -0.001497 | -1.123039 | 0.000000  |
| P  | -0.000501 | -1.832115 | 2.430044  |
| C  | 1.385555  | -2.945809 | 2.980417  |
| P  | -0.000501 | -1.832115 | -2.430044 |
| C  | 1.385555  | -2.945809 | -2.980417 |
| P  | -2.498272 | -1.017269 | 0.000000  |
| C  | -3.518600 | -2.579684 | 0.000000  |
| P  | 2.495161  | -1.015219 | 0.000000  |
| C  | 3.515551  | -2.577600 | 0.000000  |
| C  | -1.384836 | -2.948122 | -2.979314 |
| C  | -0.001257 | -0.608871 | -3.814881 |
| C  | -3.335671 | -0.113002 | 1.392740  |
| C  | -3.335671 | -0.113002 | -1.392740 |
| C  | 3.332144  | -0.110482 | 1.392576  |
| C  | 3.332144  | -0.110482 | -1.392576 |
| C  | -1.384836 | -2.948122 | 2.979314  |
| C  | -0.001257 | -0.608871 | 3.814881  |
| H  | 0.023742  | 5.625404  | 2.147133  |
| H  | 0.023742  | 5.625404  | -2.147133 |
| H  | 1.220191  | -3.266897 | 4.018516  |
| H  | 1.421357  | -3.840131 | 2.342715  |
| H  | 2.353948  | -2.436578 | 2.918655  |
| H  | -1.218608 | -3.271261 | 4.016636  |
| H  | -1.420214 | -3.841077 | 2.339651  |
| H  | -0.893205 | 0.026875  | 3.751470  |
| H  | -2.353731 | -2.439621 | 2.919127  |
| H  | 0.889805  | 0.028069  | 3.751020  |
| H  | -0.000562 | -1.136793 | 4.779126  |
| H  | 1.220191  | -3.266897 | -4.018516 |
| H  | 1.421357  | -3.840131 | -2.342715 |
| H  | 2.353948  | -2.436578 | -2.918655 |
| H  | -1.218608 | -3.271261 | -4.016636 |

|   |           |           |           |
|---|-----------|-----------|-----------|
| H | -1.420214 | -3.841077 | -2.339651 |
| H | -0.893205 | 0.026875  | -3.751470 |
| H | -2.353731 | -2.439621 | -2.919127 |
| H | 0.889805  | 0.028069  | -3.751020 |
| H | -0.000562 | -1.136793 | -4.779126 |
| H | -4.590452 | -2.335332 | 0.000000  |
| H | -3.296755 | -3.183621 | 0.888719  |
| H | -3.296755 | -3.183621 | -0.888719 |
| H | 4.587418  | -2.333279 | 0.000000  |
| H | 3.293706  | -3.181554 | 0.888705  |
| H | 3.293706  | -3.181554 | -0.888705 |
| H | -4.428346 | -0.153992 | 1.280601  |
| H | -3.064216 | -0.540677 | 2.365462  |
| H | -3.015006 | 0.937629  | -1.379928 |
| H | -3.015006 | 0.937629  | 1.379928  |
| H | -3.064216 | -0.540677 | -2.365462 |
| H | -4.428346 | -0.153992 | -1.280601 |
| H | 4.424824  | -0.151224 | 1.280460  |
| H | 4.424824  | -0.151224 | -1.280460 |
| H | 3.060782  | -0.537838 | 2.365447  |
| H | 3.011254  | 0.940061  | -1.379291 |
| H | 3.011254  | 0.940061  | 1.379291  |
| H | 3.060782  | -0.537838 | -2.365447 |
| H | -0.000418 | 1.894272  | -2.447265 |
| H | -0.886694 | 3.261928  | -3.151381 |
| H | 0.882062  | 3.262042  | -3.156627 |
| H | -1.034755 | 7.679777  | 0.000000  |
| H | 0.494147  | 7.715345  | -0.890304 |
| H | 0.494147  | 7.715345  | 0.890304  |
| H | -0.000418 | 1.894272  | 2.447265  |
| H | 0.882062  | 3.262042  | 3.156627  |
| H | -0.886694 | 3.261928  | 3.151381  |

### **PBE/TZ2P**

|    |           |          |           |
|----|-----------|----------|-----------|
| C  | 0.001000  | 2.947358 | 0.000000  |
| C  | 0.019104  | 3.660176 | 1.226101  |
| C  | 0.061138  | 5.054536 | 1.200110  |
| C  | 0.081800  | 5.774310 | 0.000000  |
| C  | 0.061138  | 5.054536 | -1.200110 |
| C  | 0.019104  | 3.660176 | -1.226101 |
| C  | -0.004204 | 2.958405 | 2.559404  |
| C  | 0.099230  | 7.279302 | 0.000000  |
| C  | -0.004204 | 2.958405 | -2.559404 |
| Si | -0.024911 | 1.065003 | 0.000000  |
| H  | 0.081239  | 5.599123 | 2.147855  |
| H  | 0.081239  | 5.599123 | -2.147855 |
| H  | -0.023314 | 1.865987 | -2.439334 |
| H  | -0.889204 | 3.247292 | -3.144260 |
| H  | 0.880003  | 3.215749 | -3.159807 |
| H  | -0.928012 | 7.675679 | 0.000000  |
| H  | 0.601518  | 7.676457 | -0.890846 |

|    |           |           |           |
|----|-----------|-----------|-----------|
| H  | 0.601518  | 7.676457  | 0.890846  |
| H  | -0.023314 | 1.865987  | 2.439334  |
| H  | 0.880003  | 3.215749  | 3.159807  |
| H  | -0.889204 | 3.247292  | 3.144260  |
| Mo | -0.008543 | -1.142365 | 0.000000  |
| P  | -0.000925 | -1.827578 | 2.428014  |
| C  | 1.402810  | -2.913050 | 2.983751  |
| P  | -0.000925 | -1.827578 | -2.428014 |
| C  | 1.402810  | -2.913050 | -2.983751 |
| P  | -2.501563 | -1.015828 | 0.000000  |
| C  | -3.543740 | -2.561560 | 0.000000  |
| P  | 2.480588  | -0.951449 | 0.000000  |
| C  | 3.561273  | -2.470868 | 0.000000  |
| C  | -1.373609 | -2.952546 | -2.981719 |
| C  | -0.018155 | -0.593720 | -3.801447 |
| C  | -3.322723 | -0.099375 | 1.392976  |
| C  | -3.322723 | -0.099375 | -1.392976 |
| C  | 3.279314  | -0.014789 | 1.392782  |
| C  | 3.279314  | -0.014789 | -1.392782 |
| C  | -1.373609 | -2.952546 | 2.981719  |
| C  | -0.018155 | -0.593720 | 3.801447  |
| H  | 1.241828  | -3.235733 | 4.022562  |
| H  | 1.458606  | -3.806590 | 2.345465  |
| H  | 2.360228  | -2.382064 | 2.921745  |
| H  | -1.203335 | -3.272430 | 4.019900  |
| H  | -1.403948 | -3.846163 | 2.341802  |
| H  | -0.917511 | 0.032028  | 3.730913  |
| H  | -2.345770 | -2.448943 | 2.920821  |
| H  | 0.866971  | 0.052238  | 3.733654  |
| H  | -0.013428 | -1.115558 | 4.769535  |
| H  | 1.241828  | -3.235733 | -4.022562 |
| H  | 1.458606  | -3.806590 | -2.345465 |
| H  | 2.360228  | -2.382064 | -2.921745 |
| H  | -1.203335 | -3.272430 | -4.019900 |
| H  | -1.403948 | -3.846163 | -2.341802 |
| H  | -0.917511 | 0.032028  | -3.730913 |
| H  | -2.345770 | -2.448943 | -2.920821 |
| H  | 0.866971  | 0.052238  | -3.733654 |
| H  | -0.013428 | -1.115558 | -4.769535 |
| H  | -4.612892 | -2.303382 | 0.000000  |
| H  | -3.327591 | -3.167830 | 0.889405  |
| H  | -3.327591 | -3.167830 | -0.889405 |
| H  | 4.623510  | -2.185552 | 0.000000  |
| H  | 3.360597  | -3.082356 | 0.889479  |
| H  | 3.360597  | -3.082356 | -0.889479 |
| H  | -4.416426 | -0.122304 | 1.280753  |
| H  | -3.056857 | -0.532772 | 2.365324  |
| H  | -2.983755 | 0.946384  | -1.380091 |
| H  | -2.983755 | 0.946384  | 1.380091  |
| H  | -3.056857 | -0.532772 | -2.365324 |
| H  | -4.416426 | -0.122304 | -1.280753 |
| H  | 4.373351  | -0.013215 | 1.281497  |



|   |          |           |           |
|---|----------|-----------|-----------|
| H | 4.373351 | -0.013215 | -1.281497 |
| H | 3.022396 | -0.452622 | 2.365549  |
| H | 2.917427 | 1.023275  | -1.378027 |
| H | 2.917427 | 1.023275  | 1.378027  |
| H | 3.022396 | -0.452622 | -2.365549 |

**PW91/TZ2P**

|    |           |           |           |
|----|-----------|-----------|-----------|
| C  | 0.001037  | 2.944807  | 0.000000  |
| C  | 0.004449  | 3.656928  | 1.224905  |
| C  | 0.012206  | 5.050404  | 1.198504  |
| C  | 0.014071  | 5.769036  | 0.000000  |
| C  | 0.012206  | 5.050404  | -1.198504 |
| C  | 0.004449  | 3.656928  | -1.224905 |
| C  | 0.001456  | 2.956805  | 2.557176  |
| C  | -0.006165 | 7.271786  | 0.000000  |
| C  | 0.001456  | 2.956805  | -2.557176 |
| Si | -0.000355 | 1.064828  | 0.000000  |
| Mo | -0.000894 | -1.143000 | 0.000000  |
| P  | -0.001506 | -1.826588 | 2.427596  |
| C  | 1.386010  | -2.929074 | 2.984125  |
| P  | -0.001506 | -1.826588 | -2.427596 |
| C  | 1.386010  | -2.929074 | -2.984125 |
| P  | -2.488699 | -0.997752 | 0.000000  |
| C  | -3.536841 | -2.537869 | 0.000000  |
| P  | 2.487101  | -0.998796 | 0.000000  |
| C  | 3.534061  | -2.539719 | 0.000000  |
| C  | -1.385876 | -2.933373 | -2.980724 |
| C  | -0.005139 | -0.593030 | -3.798718 |
| C  | -3.303634 | -0.076078 | 1.390506  |
| C  | -3.303634 | -0.076078 | -1.390506 |
| C  | 3.302877  | -0.077700 | 1.390378  |
| C  | 3.302877  | -0.077700 | -1.390378 |
| C  | -1.385876 | -2.933373 | 2.980724  |
| C  | -0.005139 | -0.593030 | 3.798718  |
| H  | 0.019964  | 5.594642  | 2.144366  |
| H  | 0.019964  | 5.594642  | -2.144366 |
| H  | 1.221244  | -3.247026 | 4.022130  |
| H  | 1.428494  | -3.822883 | 2.348910  |
| H  | 2.349474  | -2.413228 | 2.921230  |
| H  | -1.221414 | -3.252563 | 4.018395  |
| H  | -1.424924 | -3.826313 | 2.344059  |
| H  | -0.897005 | 0.039716  | 3.728728  |
| H  | -2.350911 | -2.420428 | 2.917528  |
| H  | 0.884460  | 0.043904  | 3.729984  |
| H  | -0.004646 | -1.112730 | 4.765792  |
| H  | 1.221244  | -3.247026 | -4.022130 |
| H  | 1.428494  | -3.822883 | -2.348910 |
| H  | 2.349474  | -2.413228 | -2.921230 |
| H  | -1.221414 | -3.252563 | -4.018395 |
| H  | -1.424924 | -3.826313 | -2.344059 |
| H  | -0.897005 | 0.039716  | -3.728728 |

|   |           |           |           |
|---|-----------|-----------|-----------|
| H | -2.350911 | -2.420428 | -2.917528 |
| H | 0.884460  | 0.043904  | -3.729984 |
| H | -0.004646 | -1.112730 | -4.765792 |
| H | -4.602964 | -2.275646 | 0.000000  |
| H | -3.323507 | -3.143580 | 0.887798  |
| H | -3.323507 | -3.143580 | -0.887798 |
| H | 4.600374  | -2.278267 | 0.000000  |
| H | 3.320321  | -3.145286 | 0.887806  |
| H | 3.320321  | -3.145286 | -0.887806 |
| H | -4.395780 | -0.092195 | 1.278100  |
| H | -3.041672 | -0.508584 | 2.362055  |
| H | -2.959228 | 0.965881  | -1.376420 |
| H | -2.959228 | 0.965881  | 1.376420  |
| H | -3.041672 | -0.508584 | -2.362055 |
| H | -4.395780 | -0.092195 | -1.278100 |
| H | 4.395011  | -0.095150 | 1.278030  |
| H | 4.395011  | -0.095150 | -1.278030 |
| H | 3.040375  | -0.509530 | 2.362078  |
| H | 2.959832  | 0.964684  | -1.375860 |
| H | 2.959832  | 0.964684  | 1.375860  |
| H | 3.040375  | -0.509530 | -2.362078 |
| H | 0.004765  | 1.865698  | -2.439069 |
| H | -0.884914 | 3.227399  | -3.145289 |
| H | 0.881744  | 3.232584  | -3.151840 |
| H | -1.041080 | 7.642155  | 0.000000  |
| H | 0.485612  | 7.680831  | -0.889567 |
| H | 0.485612  | 7.680831  | 0.889567  |
| H | 0.004765  | 1.865698  | 2.439069  |
| H | 0.881744  | 3.232584  | 3.151840  |
| H | -0.884914 | 3.227399  | 3.145289  |

**[(PMe<sub>3</sub>)<sub>4</sub>Mo≡Ge(Mes)]<sup>+</sup> (II)  
BP86/TZ2P**

|    |           |           |           |
|----|-----------|-----------|-----------|
| C  | 0.000312  | 3.052636  | 0.000000  |
| C  | 0.006234  | 3.758299  | 1.226770  |
| C  | 0.018037  | 5.155472  | 1.199248  |
| C  | 0.021784  | 5.875820  | 0.000000  |
| C  | 0.018037  | 5.155472  | -1.199248 |
| C  | 0.006234  | 3.758299  | -1.226770 |
| C  | 0.002756  | 3.065082  | 2.567333  |
| C  | 0.004632  | 7.382825  | 0.000000  |
| C  | 0.002756  | 3.065082  | -2.567333 |
| Ge | -0.003793 | 1.089679  | 0.000000  |
| Mo | -0.002239 | -1.165305 | 0.000000  |
| P  | -0.001022 | -1.836379 | 2.436297  |
| C  | 1.386905  | -2.936825 | 3.005861  |
| P  | -0.001022 | -1.836379 | -2.436297 |
| C  | 1.386905  | -2.936825 | -3.005861 |
| P  | -2.503078 | -1.051088 | 0.000000  |
| C  | -3.528849 | -2.608290 | 0.000000  |
| P  | 2.498296  | -1.044998 | 0.000000  |

|   |           |           |           |
|---|-----------|-----------|-----------|
| C | 3.527217  | -2.600112 | 0.000000  |
| C | -1.383866 | -2.944586 | -3.002450 |
| C | -0.005259 | -0.585158 | -3.796458 |
| C | -3.334554 | -0.137076 | 1.390303  |
| C | -3.334554 | -0.137076 | -1.390303 |
| C | 3.327795  | -0.128728 | 1.389952  |
| C | 3.327795  | -0.128728 | -1.389952 |
| C | -1.383866 | -2.944586 | 3.002450  |
| C | -0.005259 | -0.585158 | 3.796458  |
| H | 0.027827  | 5.699486  | 2.146698  |
| H | 0.027827  | 5.699486  | -2.146698 |
| H | 1.224824  | -3.236718 | 4.050810  |
| H | 1.421038  | -3.843674 | 2.385999  |
| H | 2.355046  | -2.428834 | 2.930851  |
| H | -1.220750 | -3.246973 | 4.046514  |
| H | -1.414010 | -3.849625 | 2.379732  |
| H | -0.897251 | 0.048807  | 3.717273  |
| H | -2.354134 | -2.440431 | 2.928726  |
| H | 0.885116  | 0.051425  | 3.719602  |
| H | -0.005551 | -1.091617 | 4.772213  |
| H | 1.224824  | -3.236718 | -4.050810 |
| H | 1.421038  | -3.843674 | -2.385999 |
| H | 2.355046  | -2.428834 | -2.930851 |
| H | -1.220750 | -3.246973 | -4.046514 |
| H | -1.414010 | -3.849625 | -2.379732 |
| H | -0.897251 | 0.048807  | -3.717273 |
| H | -2.354134 | -2.440431 | -2.928726 |
| H | 0.885116  | 0.051425  | -3.719602 |
| H | -0.005551 | -1.091617 | -4.772213 |
| H | -4.599959 | -2.360836 | 0.000000  |
| H | -3.308031 | -3.212521 | 0.888963  |
| H | -3.308031 | -3.212521 | -0.888963 |
| H | 4.597852  | -2.350614 | 0.000000  |
| H | 3.307553  | -3.204762 | 0.888973  |
| H | 3.307553  | -3.204762 | -0.888973 |
| H | -4.427457 | -0.175288 | 1.279555  |
| H | -3.063495 | -0.557828 | 2.365935  |
| H | -3.011240 | 0.912605  | -1.369233 |
| H | -3.011240 | 0.912605  | 1.369233  |
| H | -3.063495 | -0.557828 | -2.365935 |
| H | -4.427457 | -0.175288 | -1.279555 |
| H | 4.420784  | -0.165596 | 1.279696  |
| H | 4.420784  | -0.165596 | -1.279696 |
| H | 3.056881  | -0.548611 | 2.365966  |
| H | 3.003201  | 0.920518  | -1.367483 |
| H | 3.003201  | 0.920518  | 1.367483  |
| H | 3.056881  | -0.548611 | -2.365966 |
| H | 0.008163  | 1.972571  | -2.460085 |
| H | -0.885928 | 3.340004  | -3.152272 |
| H | 0.882369  | 3.348531  | -3.161611 |
| H | -1.030345 | 7.757117  | 0.000000  |
| H | 0.498749  | 7.790890  | -0.889932 |

|   |           |          |          |
|---|-----------|----------|----------|
| H | 0.498749  | 7.790890 | 0.889932 |
| H | 0.008163  | 1.972571 | 2.460085 |
| H | 0.882369  | 3.348531 | 3.161611 |
| H | -0.885928 | 3.340004 | 3.152272 |

**PBE/TZ2P**

|    |           |           |           |
|----|-----------|-----------|-----------|
| C  | 0.000750  | 3.039662  | 0.000000  |
| C  | 0.019476  | 3.743107  | 1.227125  |
| C  | 0.057596  | 5.139405  | 1.199643  |
| C  | 0.075614  | 5.858737  | 0.000000  |
| C  | 0.057596  | 5.139405  | -1.199643 |
| C  | 0.019476  | 3.743107  | -1.227125 |
| C  | 0.002580  | 3.046288  | 2.564446  |
| C  | 0.088785  | 7.364316  | 0.000000  |
| C  | 0.002580  | 3.046288  | -2.564446 |
| Ge | -0.023682 | 1.080332  | 0.000000  |
| H  | 0.077644  | 5.684130  | 2.147439  |
| H  | 0.077644  | 5.684130  | -2.147439 |
| H  | -0.012830 | 1.953837  | -2.453446 |
| H  | -0.881499 | 3.335924  | -3.150355 |
| H  | 0.887530  | 3.310950  | -3.160599 |
| H  | -0.938946 | 7.759104  | 0.000000  |
| H  | 0.590837  | 7.762591  | -0.890514 |
| H  | 0.590837  | 7.762591  | 0.890514  |
| H  | -0.012830 | 1.953837  | 2.453446  |
| H  | 0.887530  | 3.310950  | 3.160599  |
| H  | -0.881499 | 3.335924  | 3.150355  |
| Mo | -0.008898 | -1.174654 | 0.000000  |
| P  | -0.002560 | -1.838753 | 2.431989  |
| C  | 1.397191  | -2.921399 | 3.002180  |
| P  | -0.002560 | -1.838753 | -2.431989 |
| C  | 1.397191  | -2.921399 | -3.002180 |
| P  | -2.506389 | -1.061922 | 0.000000  |
| C  | -3.531787 | -2.617606 | 0.000000  |
| P  | 2.485244  | -1.000160 | 0.000000  |
| C  | 3.548997  | -2.530166 | 0.000000  |
| C  | -1.374112 | -2.957236 | -3.000540 |
| C  | -0.017451 | -0.582445 | -3.785373 |
| C  | -3.334336 | -0.147961 | 1.390695  |
| C  | -3.334336 | -0.147961 | -1.390695 |
| C  | 3.291316  | -0.065845 | 1.390273  |
| C  | 3.291316  | -0.065845 | -1.390273 |
| C  | -1.374112 | -2.957236 | 3.000540  |
| C  | -0.017451 | -0.582445 | 3.785373  |
| H  | 1.235871  | -3.225475 | 4.046578  |
| H  | 1.444651  | -3.825969 | 2.378933  |
| H  | 2.358276  | -2.398777 | 2.929507  |
| H  | -1.204342 | -3.259453 | 4.044124  |
| H  | -1.398587 | -3.861320 | 2.375227  |
| H  | -0.915575 | 0.043481  | 3.701964  |
| H  | -2.348367 | -2.459340 | 2.929618  |

|   |           |           |           |
|---|-----------|-----------|-----------|
| H | 0.868460  | 0.060940  | 3.703957  |
| H | -0.013333 | -1.085860 | 4.763302  |
| H | 1.235871  | -3.225475 | -4.046578 |
| H | 1.444651  | -3.825969 | -2.378933 |
| H | 2.358276  | -2.398777 | -2.929507 |
| H | -1.204342 | -3.259453 | -4.044124 |
| H | -1.398587 | -3.861320 | -2.375227 |
| H | -0.915575 | 0.043481  | -3.701964 |
| H | -2.348367 | -2.459340 | -2.929618 |
| H | 0.868460  | 0.060940  | -3.703957 |
| H | -0.013333 | -1.085860 | -4.763302 |
| H | -4.603588 | -2.370513 | 0.000000  |
| H | -3.308757 | -3.221102 | 0.889662  |
| H | -3.308757 | -3.221102 | -0.889662 |
| H | 4.614292  | -2.256314 | 0.000000  |
| H | 3.341147  | -3.138986 | 0.889714  |
| H | 3.341147  | -3.138986 | -0.889714 |
| H | -4.427801 | -0.184657 | 1.279814  |
| H | -3.062088 | -0.571099 | 2.365476  |
| H | -3.007971 | 0.901528  | -1.369733 |
| H | -3.007971 | 0.901528  | 1.369733  |
| H | -3.062088 | -0.571099 | -2.365476 |
| H | -4.427801 | -0.184657 | -1.279814 |
| H | 4.385396  | -0.078088 | 1.280111  |
| H | 4.385396  | -0.078088 | -1.280111 |
| H | 3.027997  | -0.493490 | 2.365531  |
| H | 2.941960  | 0.976241  | -1.367549 |
| H | 2.941960  | 0.976241  | 1.367549  |
| H | 3.027997  | -0.493490 | -2.365531 |

### PW91/TZ2P

|    |           |           |           |
|----|-----------|-----------|-----------|
| C  | 0.000687  | 3.038228  | 0.000000  |
| C  | 0.005738  | 3.741029  | 1.225690  |
| C  | 0.015659  | 5.135647  | 1.198003  |
| C  | 0.018665  | 5.853876  | 0.000000  |
| C  | 0.015659  | 5.135647  | -1.198003 |
| C  | 0.005738  | 3.741029  | -1.225690 |
| C  | 0.004050  | 3.045524  | 2.561658  |
| C  | 0.001425  | 7.357122  | 0.000000  |
| C  | 0.004050  | 3.045524  | -2.561658 |
| Ge | -0.002179 | 1.080605  | 0.000000  |
| Mo | -0.001112 | -1.173406 | 0.000000  |
| P  | -0.002140 | -1.830723 | 2.434171  |
| C  | 1.384318  | -2.924831 | 3.008978  |
| P  | -0.002140 | -1.830723 | -2.434171 |
| C  | 1.384318  | -2.924831 | -3.008978 |
| P  | -2.495956 | -1.040641 | 0.000000  |
| C  | -3.532151 | -2.587525 | 0.000000  |
| P  | 2.493542  | -1.035514 | 0.000000  |
| C  | 3.531319  | -2.581332 | 0.000000  |
| C  | -1.385107 | -2.932200 | -3.001157 |

|   |           |           |           |
|---|-----------|-----------|-----------|
| C | -0.008947 | -0.571025 | -3.782303 |
| C | -3.315442 | -0.119198 | 1.388303  |
| C | -3.315442 | -0.119198 | -1.388303 |
| C | 3.311914  | -0.112352 | 1.387889  |
| C | 3.311914  | -0.112352 | -1.387889 |
| C | -1.385107 | -2.932200 | 3.001157  |
| C | -0.008947 | -0.571025 | 3.782303  |
| H | 0.025246  | 5.679980  | 2.143816  |
| H | 0.025246  | 5.679980  | -2.143816 |
| H | 1.220406  | -3.221387 | 4.053353  |
| H | 1.420681  | -3.830937 | 2.391395  |
| H | 2.349574  | -2.414755 | 2.933556  |
| H | -1.222986 | -3.231643 | 4.044975  |
| H | -1.416234 | -3.836365 | 2.380379  |
| H | -0.899223 | 0.061408  | 3.695055  |
| H | -2.352181 | -2.425621 | 2.924754  |
| H | 0.881272  | 0.063431  | 3.701671  |
| H | -0.011748 | -1.070187 | 4.760067  |
| H | 1.220406  | -3.221387 | -4.053353 |
| H | 1.420681  | -3.830937 | -2.391395 |
| H | 2.349574  | -2.414755 | -2.933556 |
| H | -1.222986 | -3.231643 | -4.044975 |
| H | -1.416234 | -3.836365 | -2.380379 |
| H | -0.899223 | 0.061408  | -3.695055 |
| H | -2.352181 | -2.425621 | -2.924754 |
| H | 0.881272  | 0.063431  | -3.701671 |
| H | -0.011748 | -1.070187 | -4.760067 |
| H | -4.600082 | -2.333269 | 0.000000  |
| H | -3.313707 | -3.191048 | 0.887892  |
| H | -3.313707 | -3.191048 | -0.887892 |
| H | 4.599032  | -2.326162 | 0.000000  |
| H | 3.313376  | -3.185024 | 0.887930  |
| H | 3.313376  | -3.185024 | -0.887930 |
| H | -4.407321 | -0.145493 | 1.277072  |
| H | -3.048468 | -0.543048 | 2.362353  |
| H | -2.980037 | 0.925331  | -1.366649 |
| H | -2.980037 | 0.925331  | 1.366649  |
| H | -3.048468 | -0.543048 | -2.362353 |
| H | -4.407321 | -0.145493 | -1.277072 |
| H | 4.403868  | -0.138576 | 1.277291  |
| H | 4.403868  | -0.138576 | -1.277291 |
| H | 3.044441  | -0.534938 | 2.362315  |
| H | 2.976537  | 0.932175  | -1.364753 |
| H | 2.976537  | 0.932175  | 1.364753  |
| H | 3.044441  | -0.534938 | -2.362315 |
| H | 0.011275  | 1.954653  | -2.451724 |
| H | -0.883685 | 3.316851  | -3.147168 |
| H | 0.882445  | 3.328409  | -3.155506 |
| H | -1.031946 | 7.730888  | 0.000000  |
| H | 0.495005  | 7.764587  | -0.889161 |
| H | 0.495005  | 7.764587  | 0.889161  |
| H | 0.011275  | 1.954653  | 2.451724  |

|   |           |          |          |
|---|-----------|----------|----------|
| H | 0.882445  | 3.328409 | 3.155506 |
| H | -0.883685 | 3.316851 | 3.147168 |

**[(PMe<sub>3</sub>)<sub>4</sub>Mo≡Sn(Mes)]<sup>+</sup> (III)**

**BP86/TZ2P**

|    |           |           |           |
|----|-----------|-----------|-----------|
| C  | 0.000331  | 3.343919  | 0.000000  |
| C  | 0.004818  | 4.043618  | 1.226502  |
| C  | 0.015144  | 5.441984  | 1.199832  |
| C  | 0.018237  | 6.161454  | 0.000000  |
| C  | 0.015144  | 5.441984  | -1.199832 |
| C  | 0.004818  | 4.043618  | -1.226502 |
| C  | 0.000813  | 3.354181  | 2.570680  |
| C  | 0.000023  | 7.668728  | 0.000000  |
| C  | 0.000813  | 3.354181  | -2.570680 |
| Sn | -0.001692 | 1.187721  | 0.000000  |
| Mo | -0.001809 | -1.264404 | 0.000000  |
| P  | -0.001351 | -1.906764 | 2.439824  |
| C  | 1.377974  | -3.007742 | 3.030638  |
| P  | -0.001351 | -1.906764 | -2.439824 |
| C  | 1.377974  | -3.007742 | -3.030638 |
| P  | -2.503002 | -1.193166 | 0.000000  |
| C  | -3.469552 | -2.788084 | 0.000000  |
| P  | 2.499723  | -1.190647 | 0.000000  |
| C  | 3.468053  | -2.784416 | 0.000000  |
| C  | -1.380536 | -3.007516 | -3.031474 |
| C  | -0.000116 | -0.626714 | -3.774698 |
| C  | -3.374982 | -0.308436 | 1.386593  |
| C  | -3.374982 | -0.308436 | -1.386593 |
| C  | 3.370735  | -0.305402 | 1.386697  |
| C  | 3.370735  | -0.305402 | -1.386697 |
| C  | -1.380536 | -3.007516 | 3.031474  |
| C  | -0.000116 | -0.626714 | 3.774698  |
| H  | 0.024647  | 5.986734  | 2.147052  |
| H  | 0.024647  | 5.986734  | -2.147052 |
| H  | 1.214117  | -3.280682 | 4.082649  |
| H  | 1.395555  | -3.929893 | 2.432972  |
| H  | 2.353818  | -2.518023 | 2.941758  |
| H  | -1.219017 | -3.275706 | 4.085065  |
| H  | -1.394343 | -3.932216 | 2.437640  |
| H  | -0.890258 | 0.007841  | 3.677810  |
| H  | -2.357141 | -2.520361 | 2.937687  |
| H  | 0.891606  | 0.005518  | 3.677440  |
| H  | -0.000415 | -1.107189 | 4.763872  |
| H  | 1.214117  | -3.280682 | -4.082649 |
| H  | 1.395555  | -3.929893 | -2.432972 |
| H  | 2.353818  | -2.518023 | -2.941758 |
| H  | -1.219017 | -3.275706 | -4.085065 |
| H  | -1.394343 | -3.932216 | -2.437640 |
| H  | -0.890258 | 0.007841  | -3.677810 |
| H  | -2.357141 | -2.520361 | -2.937687 |
| H  | 0.891606  | 0.005518  | -3.677440 |

|   |           |           |           |
|---|-----------|-----------|-----------|
| H | -0.000415 | -1.107189 | -4.763872 |
| H | -4.549241 | -2.582561 | 0.000000  |
| H | -3.225338 | -3.383187 | 0.888734  |
| H | -3.225338 | -3.383187 | -0.888734 |
| H | 4.547521  | -2.577698 | 0.000000  |
| H | 3.224523  | -3.379716 | 0.888804  |
| H | 3.224523  | -3.379716 | -0.888804 |
| H | -4.464751 | -0.411001 | 1.285316  |
| H | -3.072990 | -0.694650 | 2.367021  |
| H | -3.113773 | 0.757970  | -1.346650 |
| H | -3.113773 | 0.757970  | 1.346650  |
| H | -3.072990 | -0.694650 | -2.367021 |
| H | -4.464751 | -0.411001 | -1.285316 |
| H | 4.460664  | -0.405160 | 1.284354  |
| H | 4.460664  | -0.405160 | -1.284354 |
| H | 3.070572  | -0.693859 | 2.366760  |
| H | 3.106951  | 0.760428  | -1.348519 |
| H | 3.106951  | 0.760428  | 1.348519  |
| H | 3.070572  | -0.693859 | -2.366760 |
| H | 0.018751  | 2.258613  | -2.475695 |
| H | -0.894811 | 3.618939  | -3.149570 |
| H | 0.874135  | 3.646828  | -3.169434 |
| H | -1.035135 | 8.042392  | 0.000000  |
| H | 0.494265  | 8.076775  | -0.889904 |
| H | 0.494265  | 8.076775  | 0.889904  |
| H | 0.018751  | 2.258613  | 2.475695  |
| H | 0.874135  | 3.646828  | 3.169434  |
| H | -0.894811 | 3.618939  | 3.149570  |

### **PBE/TZ2P**

|    |           |          |           |
|----|-----------|----------|-----------|
| C  | 0.003238  | 3.323591 | 0.000000  |
| C  | 0.023850  | 4.021505 | 1.226848  |
| C  | 0.067758  | 5.418769 | 1.199949  |
| C  | 0.088669  | 6.137425 | 0.000000  |
| C  | 0.067758  | 5.418769 | -1.199949 |
| C  | 0.023850  | 4.021505 | -1.226848 |
| C  | 0.002855  | 3.330877 | 2.569262  |
| C  | 0.109379  | 7.643282 | 0.000000  |
| C  | 0.002855  | 3.330877 | -2.569262 |
| Sn | -0.030987 | 1.169720 | 0.000000  |
| H  | 0.090594  | 5.964076 | 2.147558  |
| H  | 0.090594  | 5.964076 | -2.147558 |
| H  | -0.009144 | 2.234515 | -2.475029 |
| H  | -0.884976 | 3.619627 | -3.149654 |
| H  | 0.884515  | 3.599763 | -3.168022 |
| H  | -0.916205 | 8.043480 | 0.000000  |
| H  | 0.613947  | 8.038597 | -0.890442 |
| H  | 0.613947  | 8.038597 | 0.890442  |
| H  | -0.009144 | 2.234515 | 2.475029  |
| H  | 0.884515  | 3.599763 | 3.168022  |
| H  | -0.884976 | 3.619627 | 3.149654  |



|    |           |           |           |
|----|-----------|-----------|-----------|
| Mo | -0.010110 | -1.280856 | 0.000000  |
| P  | -0.003405 | -1.909217 | 2.438001  |
| C  | 1.392879  | -2.981702 | 3.036665  |
| P  | -0.003405 | -1.909217 | -2.438001 |
| C  | 1.392879  | -2.981702 | -3.036665 |
| P  | -2.508814 | -1.214563 | 0.000000  |
| C  | -3.472215 | -2.809259 | 0.000000  |
| P  | 2.485543  | -1.143301 | 0.000000  |
| C  | 3.492017  | -2.711523 | 0.000000  |
| C  | -1.365664 | -3.025118 | -3.035072 |
| C  | -0.023883 | -0.615864 | -3.757891 |
| C  | -3.377480 | -0.330169 | 1.386587  |
| C  | -3.377480 | -0.330169 | -1.386587 |
| C  | 3.330983  | -0.235865 | 1.386436  |
| C  | 3.330983  | -0.235865 | -1.386436 |
| C  | -1.365664 | -3.025118 | 3.035072  |
| C  | -0.023883 | -0.615864 | 3.757891  |
| H  | 1.234918  | -3.247369 | 4.091934  |
| H  | 1.422802  | -3.908715 | 2.445908  |
| H  | 2.361009  | -2.477225 | 2.939803  |
| H  | -1.198208 | -3.288290 | 4.089508  |
| H  | -1.368168 | -3.951214 | 2.442157  |
| H  | -0.923730 | 0.004320  | 3.650016  |
| H  | -2.348771 | -2.549978 | 2.940824  |
| H  | 0.859420  | 0.028261  | 3.653353  |
| H  | -0.019133 | -1.085713 | 4.752751  |
| H  | 1.234918  | -3.247369 | -4.091934 |
| H  | 1.422802  | -3.908715 | -2.445908 |
| H  | 2.361009  | -2.477225 | -2.939803 |
| H  | -1.198208 | -3.288290 | -4.089508 |
| H  | -1.368168 | -3.951214 | -2.442157 |
| H  | -0.923730 | 0.004320  | -3.650016 |
| H  | -2.348771 | -2.549978 | -2.940824 |
| H  | 0.859420  | 0.028261  | -3.653353 |
| H  | -0.019133 | -1.085713 | -4.752751 |
| H  | -4.553377 | -2.608745 | 0.000000  |
| H  | -3.223394 | -3.402977 | 0.889187  |
| H  | -3.223394 | -3.402977 | -0.889187 |
| H  | 4.567340  | -2.481631 | 0.000000  |
| H  | 3.259511  | -3.311741 | 0.889252  |
| H  | 3.259511  | -3.311741 | -0.889252 |
| H  | -4.467965 | -0.431630 | 1.285851  |
| H  | -3.073698 | -0.717741 | 2.366470  |
| H  | -3.113959 | 0.736467  | -1.346218 |
| H  | -3.113959 | 0.736467  | 1.346218  |
| H  | -3.073698 | -0.717741 | -2.366470 |
| H  | -4.467965 | -0.431630 | -1.285851 |
| H  | 4.423714  | -0.311978 | 1.287649  |
| H  | 4.423714  | -0.311978 | -1.287649 |
| H  | 3.034647  | -0.628044 | 2.366779  |
| H  | 3.043343  | 0.824494  | -1.343255 |
| H  | 3.043343  | 0.824494  | 1.343255  |

|   |          |           |           |
|---|----------|-----------|-----------|
| H | 3.034647 | -0.628044 | -2.366779 |
|---|----------|-----------|-----------|

**PW91/TZ2P**

|    |           |           |           |
|----|-----------|-----------|-----------|
| C  | 0.001578  | 3.326528  | 0.000000  |
| C  | 0.006685  | 4.022926  | 1.225614  |
| C  | 0.016872  | 5.418553  | 1.199126  |
| C  | 0.019725  | 6.136661  | 0.000000  |
| C  | 0.016872  | 5.418553  | -1.199126 |
| C  | 0.006685  | 4.022926  | -1.225614 |
| C  | 0.003452  | 3.331573  | 2.565805  |
| C  | 0.002993  | 7.640141  | 0.000000  |
| C  | 0.003452  | 3.331573  | -2.565805 |
| Sn | -0.002998 | 1.176722  | 0.000000  |
| H  | 0.027382  | 5.963539  | 2.144759  |
| H  | 0.027382  | 5.963539  | -2.144759 |
| H  | 0.026974  | 2.237338  | -2.470053 |
| H  | -0.893422 | 3.590691  | -3.142956 |
| H  | 0.873109  | 3.627242  | -3.166097 |
| H  | -1.030314 | 8.014309  | 0.000000  |
| H  | 0.497023  | 8.047285  | -0.889152 |
| H  | 0.497023  | 8.047285  | 0.889152  |
| H  | 0.026974  | 2.237338  | 2.470053  |
| H  | 0.873109  | 3.627242  | 3.166097  |
| H  | -0.893422 | 3.590691  | 3.142956  |
| Mo | -0.001782 | -1.272239 | 0.000000  |
| P  | -0.001906 | -1.898628 | 2.436625  |
| C  | 1.377517  | -2.989169 | 3.034655  |
| P  | -0.001906 | -1.898628 | -2.436625 |
| C  | 1.377517  | -2.989169 | -3.034655 |
| P  | -2.495712 | -1.182925 | 0.000000  |
| C  | -3.471776 | -2.768597 | 0.000000  |
| P  | 2.492441  | -1.177767 | 0.000000  |
| C  | 3.471612  | -2.761537 | 0.000000  |
| C  | -1.378654 | -2.993616 | -3.034657 |
| C  | -0.003953 | -0.603878 | -3.752159 |
| C  | -3.355945 | -0.289947 | 1.384103  |
| C  | -3.355945 | -0.289947 | -1.384103 |
| C  | 3.351311  | -0.283528 | 1.384181  |
| C  | 3.351311  | -0.283528 | -1.384181 |
| C  | -1.378654 | -2.993616 | 3.034657  |
| C  | -0.003953 | -0.603878 | 3.752159  |
| H  | 1.213612  | -3.255093 | 4.087288  |
| H  | 1.397004  | -3.913167 | 2.442893  |
| H  | 2.350455  | -2.497733 | 2.942237  |
| H  | -1.215799 | -3.255983 | 4.088343  |
| H  | -1.392734 | -3.919259 | 2.445314  |
| H  | -0.894057 | 0.026325  | 3.644084  |
| H  | -2.353471 | -2.506637 | 2.938804  |
| H  | 0.885687  | 0.027222  | 3.645160  |
| H  | -0.004100 | -1.070536 | 4.746372  |
| H  | 1.213612  | -3.255093 | -4.087288 |

|   |           |           |           |
|---|-----------|-----------|-----------|
| H | 1.397004  | -3.913167 | -2.442893 |
| H | 2.350455  | -2.497733 | -2.942237 |
| H | -1.215799 | -3.255983 | -4.088343 |
| H | -1.392734 | -3.919259 | -2.445314 |
| H | -0.894057 | 0.026325  | -3.644084 |
| H | -2.353471 | -2.506637 | -2.938804 |
| H | 0.885687  | 0.027222  | -3.645160 |
| H | -0.004100 | -1.070536 | -4.746372 |
| H | -4.548936 | -2.557207 | 0.000000  |
| H | -3.229468 | -3.362952 | 0.887745  |
| H | -3.229468 | -3.362952 | -0.887745 |
| H | 4.548352  | -2.547950 | 0.000000  |
| H | 3.230571  | -3.356375 | 0.887787  |
| H | 3.230571  | -3.356375 | -0.887787 |
| H | -4.445547 | -0.380314 | 1.282696  |
| H | -3.057525 | -0.678353 | 2.363438  |
| H | -3.082045 | 0.772030  | -1.342294 |
| H | -3.082045 | 0.772030  | 1.342294  |
| H | -3.057525 | -0.678353 | -2.363438 |
| H | -4.445547 | -0.380314 | -1.282696 |
| H | 4.441080  | -0.371470 | 1.282233  |
| H | 4.441080  | -0.371470 | -1.282233 |
| H | 3.054258  | -0.673288 | 2.363406  |
| H | 3.075302  | 0.777961  | -1.343268 |
| H | 3.075302  | 0.777961  | 1.343268  |
| H | 3.054258  | -0.673288 | -2.363406 |

**[(PMe<sub>3</sub>)<sub>4</sub>Mo≡Pb(Mes)]<sup>+</sup> (IV)  
BP86/TZ2P**

|    |           |           |           |
|----|-----------|-----------|-----------|
| C  | -0.003448 | 3.451493  | 0.000000  |
| C  | 0.003746  | 4.143730  | 1.226803  |
| C  | 0.020171  | 5.543490  | 1.199624  |
| C  | 0.027132  | 6.262791  | 0.000000  |
| C  | 0.020171  | 5.543490  | -1.199624 |
| C  | 0.003746  | 4.143730  | -1.226803 |
| C  | -0.003619 | 3.457610  | 2.573717  |
| C  | 0.016738  | 7.770605  | 0.000000  |
| C  | -0.003619 | 3.457610  | -2.573717 |
| Pb | -0.004421 | 1.213784  | 0.000000  |
| Mo | -0.000679 | -1.296776 | 0.000000  |
| P  | 0.000216  | -1.926049 | 2.440777  |
| C  | 1.379231  | -3.025167 | 3.037448  |
| P  | 0.000216  | -1.926049 | -2.440777 |
| C  | 1.379231  | -3.025167 | -3.037448 |
| P  | -2.501566 | -1.239930 | 0.000000  |
| C  | -3.451003 | -2.844697 | 0.000000  |
| P  | 2.500569  | -1.234683 | 0.000000  |
| C  | 3.451552  | -2.838564 | 0.000000  |
| C  | -1.375409 | -3.029584 | -3.036818 |
| C  | -0.001476 | -0.642988 | -3.773920 |

|   |           |           |           |
|---|-----------|-----------|-----------|
| C | -3.383302 | -0.361333 | 1.384838  |
| C | -3.383302 | -0.361333 | -1.384838 |
| C | 3.381314  | -0.355059 | 1.384799  |
| C | 3.381314  | -0.355059 | -1.384799 |
| C | -1.375409 | -3.029584 | 3.036818  |
| C | -0.001476 | -0.642988 | 3.773920  |
| H | 0.031398  | 6.087675  | 2.147299  |
| H | 0.031398  | 6.087675  | -2.147299 |
| H | 1.217467  | -3.289782 | 4.091850  |
| H | 1.391572  | -3.951938 | 2.446904  |
| H | 2.356723  | -2.540491 | 2.942339  |
| H | -1.212648 | -3.294716 | 4.090918  |
| H | -1.385415 | -3.955827 | 2.445402  |
| H | -0.893142 | -0.011013 | 3.674770  |
| H | -2.354233 | -2.547443 | 2.942401  |
| H | 0.888119  | -0.008233 | 3.673940  |
| H | -0.000187 | -1.118782 | 4.765344  |
| H | 1.217467  | -3.289782 | -4.091850 |
| H | 1.391572  | -3.951938 | -2.446904 |
| H | 2.356723  | -2.540491 | -2.942339 |
| H | -1.212648 | -3.294716 | -4.090918 |
| H | -1.385415 | -3.955827 | -2.445402 |
| H | -0.893142 | -0.011013 | -3.674770 |
| H | -2.354233 | -2.547443 | -2.942401 |
| H | 0.888119  | -0.008233 | -3.673940 |
| H | -0.000187 | -1.118782 | -4.765344 |
| H | -4.532991 | -2.652008 | 0.000000  |
| H | -3.199690 | -3.436846 | 0.888528  |
| H | -3.199690 | -3.436846 | -0.888528 |
| H | 4.533381  | -2.645006 | 0.000000  |
| H | 3.200707  | -3.430899 | 0.888549  |
| H | 3.200707  | -3.430899 | -0.888549 |
| H | -4.471882 | -0.477171 | 1.285525  |
| H | -3.075446 | -0.738780 | 2.366602  |
| H | -3.136361 | 0.708325  | -1.340057 |
| H | -3.136361 | 0.708325  | 1.340057  |
| H | -3.075446 | -0.738780 | -2.366602 |
| H | -4.471882 | -0.477171 | -1.285525 |
| H | 4.470006  | -0.469891 | 1.285467  |
| H | 4.470006  | -0.469891 | -1.285467 |
| H | 3.073886  | -0.732531 | 2.366683  |
| H | 3.133395  | 0.714340  | -1.339702 |
| H | 3.133395  | 0.714340  | 1.339702  |
| H | 3.073886  | -0.732531 | -2.366683 |
| H | 0.000097  | 2.361745  | -2.486455 |
| H | -0.893638 | 3.736329  | -3.154621 |
| H | 0.875547  | 3.742038  | -3.167988 |
| H | -1.016040 | 8.150451  | 0.000000  |
| H | 0.513739  | 8.175795  | -0.889639 |
| H | 0.513739  | 8.175795  | 0.889639  |
| H | 0.000097  | 2.361745  | 2.486455  |
| H | 0.875547  | 3.742038  | 3.167988  |

H            -0.893638        3.736329        3.154621

**PBE/TZ2P**

|    |           |           |           |
|----|-----------|-----------|-----------|
| C  | 3.424193  | -0.432884 | 0.000000  |
| C  | 4.111366  | -0.507381 | -1.227081 |
| C  | 5.502781  | -0.656623 | -1.199757 |
| C  | 6.217378  | -0.734788 | 0.000000  |
| C  | 5.502781  | -0.656623 | 1.199757  |
| C  | 4.111366  | -0.507381 | 1.227081  |
| C  | 3.429203  | -0.431005 | -2.573173 |
| C  | 3.429203  | -0.431005 | 2.573173  |
| C  | 7.711926  | -0.923891 | 0.000000  |
| Pb | 1.211563  | -0.163928 | 0.000000  |
| H  | 6.045326  | -0.710691 | -2.147871 |
| H  | 6.045326  | -0.710691 | 2.147871  |
| H  | 2.337051  | -0.329555 | 2.489437  |
| H  | 3.628302  | -1.333297 | 3.168503  |
| H  | 3.793899  | 0.428536  | 3.153422  |
| H  | 2.337051  | -0.329555 | -2.489437 |
| H  | 3.793899  | 0.428536  | -3.153422 |
| H  | 3.628302  | -1.333297 | -3.168503 |
| H  | 7.966248  | -1.994954 | 0.000000  |
| H  | 8.173464  | -0.478705 | -0.890250 |
| H  | 8.173464  | -0.478705 | 0.890250  |
| Mo | -1.274743 | 0.159441  | 0.000000  |
| P  | -1.884242 | 0.239512  | -2.436631 |
| C  | -2.791124 | 1.745963  | -3.043646 |
| P  | -1.884242 | 0.239512  | 2.436631  |
| C  | -2.791124 | 1.745963  | 3.043646  |
| P  | -1.523227 | -2.325281 | 0.000000  |
| C  | -3.231326 | -3.069597 | 0.000000  |
| P  | -0.871360 | 2.623314  | 0.000000  |
| C  | -2.328704 | 3.784184  | 0.000000  |
| C  | -3.148595 | -0.983792 | 3.041480  |
| C  | -0.596645 | 0.068953  | 3.752760  |
| C  | -0.758580 | -3.306748 | -1.384092 |
| C  | -0.758580 | -3.306748 | 1.384092  |
| C  | 0.121650  | 3.373160  | -1.383927 |
| C  | 0.121650  | 3.373160  | 1.383927  |
| C  | -3.148595 | -0.983792 | -3.041480 |
| C  | -0.596645 | 0.068953  | -3.752760 |
| H  | -3.066355 | 1.615774  | -4.100212 |
| H  | -3.713237 | 1.877540  | -2.459245 |
| H  | -2.185845 | 2.653974  | -2.945561 |
| H  | -3.381096 | -0.789420 | -4.098460 |
| H  | -4.073488 | -0.872579 | -2.457244 |
| H  | -0.086051 | -0.896888 | -3.640777 |
| H  | -2.797226 | -2.016753 | -2.941246 |
| H  | 0.145944  | 0.870641  | -3.643483 |
| H  | -1.055279 | 0.127475  | -4.751075 |
| H  | -3.066355 | 1.615774  | 4.100212  |

|   |           |           |           |
|---|-----------|-----------|-----------|
| H | -3.713237 | 1.877540  | 2.459245  |
| H | -2.185845 | 2.653974  | 2.945561  |
| H | -3.381096 | -0.789420 | 4.098460  |
| H | -4.073488 | -0.872579 | 2.457244  |
| H | -0.086051 | -0.896888 | 3.640777  |
| H | -2.797226 | -2.016753 | 2.941246  |
| H | 0.145944  | 0.870641  | 3.643483  |
| H | -1.055279 | 0.127475  | 4.751075  |
| H | -3.174623 | -4.167707 | 0.000000  |
| H | -3.787132 | -2.745186 | -0.889057 |
| H | -3.787132 | -2.745186 | 0.889057  |
| H | -1.989971 | 4.830271  | 0.000000  |
| H | -2.949482 | 3.614507  | -0.889061 |
| H | -2.949482 | 3.614507  | 0.889061  |
| H | -1.006194 | -4.373543 | -1.283605 |
| H | -1.095402 | -2.954937 | -2.366433 |
| H | 0.333809  | -3.191086 | 1.338177  |
| H | 0.333809  | -3.191086 | -1.338177 |
| H | -1.095402 | -2.954937 | 2.366433  |
| H | -1.006194 | -4.373543 | 1.283605  |
| H | 0.158103  | 4.467765  | -1.284133 |
| H | 0.158103  | 4.467765  | 1.284133  |
| H | -0.293992 | 3.119591  | -2.366338 |
| H | 1.147065  | 2.979216  | 1.337124  |
| H | 1.147065  | 2.979216  | -1.337124 |
| H | -0.293992 | 3.119591  | 2.366338  |

### PW91/TZ2P

|    |           |           |           |
|----|-----------|-----------|-----------|
| C  | 0.008877  | 3.431960  | 0.000000  |
| C  | 0.016199  | 4.121397  | 1.225786  |
| C  | 0.029364  | 5.518776  | 1.198339  |
| C  | 0.032900  | 6.236177  | 0.000000  |
| C  | 0.029364  | 5.518776  | -1.198339 |
| C  | 0.016199  | 4.121397  | -1.225786 |
| C  | 0.011310  | 3.434840  | 2.569589  |
| C  | 0.015166  | 7.740234  | 0.000000  |
| C  | 0.011310  | 3.434840  | -2.569589 |
| Pb | -0.005924 | 1.202017  | 0.000000  |
| Mo | -0.003858 | -1.302379 | 0.000000  |
| P  | -0.000750 | -1.910787 | 2.438616  |
| C  | 1.381000  | -2.995541 | 3.045383  |
| P  | -0.000750 | -1.910787 | -2.438616 |
| C  | 1.381000  | -2.995541 | -3.045383 |
| P  | -2.498707 | -1.236040 | 0.000000  |
| C  | -3.449737 | -2.836642 | 0.000000  |
| P  | 2.490472  | -1.217612 | 0.000000  |
| C  | 3.453602  | -2.810847 | 0.000000  |
| C  | -1.369774 | -3.009834 | -3.046574 |
| C  | -0.006439 | -0.607866 | -3.747546 |
| C  | -3.374392 | -0.352071 | 1.381068  |
| C  | -3.374392 | -0.352071 | -1.381068 |

|   |           |           |           |
|---|-----------|-----------|-----------|
| C | 3.359209  | -0.327373 | 1.381467  |
| C | 3.359209  | -0.327373 | -1.381467 |
| C | -1.369774 | -3.009834 | 3.046574  |
| C | -0.006439 | -0.607866 | 3.747546  |
| H | 0.039556  | 6.063398  | 2.144394  |
| H | 0.039556  | 6.063398  | -2.144394 |
| H | 1.220485  | -3.249727 | 4.101341  |
| H | 1.396280  | -3.926002 | 2.463854  |
| H | 2.354639  | -2.507826 | 2.944180  |
| H | -1.205071 | -3.263174 | 4.102096  |
| H | -1.376175 | -3.940058 | 2.464478  |
| H | -0.899065 | 0.017981  | 3.635056  |
| H | -2.348718 | -2.532541 | 2.947255  |
| H | 0.879975  | 0.026614  | 3.634351  |
| H | -0.003769 | -1.065278 | 4.745994  |
| H | 1.220485  | -3.249727 | -4.101341 |
| H | 1.396280  | -3.926002 | -2.463854 |
| H | 2.354639  | -2.507826 | -2.944180 |
| H | -1.205071 | -3.263174 | -4.102096 |
| H | -1.376175 | -3.940058 | -2.464478 |
| H | -0.899065 | 0.017981  | -3.635056 |
| H | -2.348718 | -2.532541 | -2.947255 |
| H | 0.879975  | 0.026614  | -3.634351 |
| H | -0.003769 | -1.065278 | -4.745994 |
| H | -4.530188 | -2.643404 | 0.000000  |
| H | -3.197408 | -3.426833 | 0.887550  |
| H | -3.197408 | -3.426833 | -0.887550 |
| H | 4.532559  | -2.609422 | 0.000000  |
| H | 3.205670  | -3.402892 | 0.887561  |
| H | 3.205670  | -3.402892 | -0.887561 |
| H | -4.462187 | -0.463193 | 1.281478  |
| H | -3.068042 | -0.727359 | 2.362741  |
| H | -3.122193 | 0.714889  | -1.332198 |
| H | -3.122193 | 0.714889  | 1.332198  |
| H | -3.068042 | -0.727359 | -2.362741 |
| H | -4.462187 | -0.463193 | -1.281478 |
| H | 4.447849  | -0.430475 | 1.282491  |
| H | 4.447849  | -0.430475 | -1.282491 |
| H | 3.055013  | -0.704917 | 2.362994  |
| H | 3.099414  | 0.737813  | -1.332502 |
| H | 3.099414  | 0.737813  | 1.332502  |
| H | 3.055013  | -0.704917 | -2.362994 |
| H | 0.023172  | 2.340076  | -2.484060 |
| H | -0.880301 | 3.707288  | -3.148673 |
| H | 0.886379  | 3.725519  | -3.164476 |
| H | -1.018071 | 8.114272  | 0.000000  |
| H | 0.509380  | 8.147572  | -0.888935 |
| H | 0.509380  | 8.147572  | 0.888935  |
| H | 0.023172  | 2.340076  | 2.484060  |
| H | 0.886379  | 3.725519  | 3.164476  |
| H | -0.880301 | 3.707288  | 3.148673  |

### Non-relativistic at BP86

|    |           |           |           |
|----|-----------|-----------|-----------|
| C  | 0.005751  | 3.502389  | 0.000000  |
| C  | 0.025854  | 4.203364  | 1.225837  |
| C  | 0.069026  | 5.602338  | 1.199462  |
| C  | 0.090002  | 6.322027  | 0.000000  |
| C  | 0.069026  | 5.602338  | -1.199462 |
| C  | 0.025854  | 4.203364  | -1.225837 |
| C  | 0.004144  | 3.520773  | 2.574119  |
| C  | 0.109023  | 7.829698  | 0.000000  |
| C  | 0.004144  | 3.520773  | -2.574119 |
| Pb | -0.023801 | 1.239856  | 0.000000  |
| Mo | -0.003598 | -1.331075 | 0.000000  |
| P  | 0.003231  | -1.974412 | 2.440548  |
| C  | 1.398389  | -3.066165 | 3.007090  |
| P  | 0.003231  | -1.974412 | -2.440548 |
| C  | 1.398389  | -3.066165 | -3.007090 |
| P  | -2.521498 | -1.280136 | 0.000000  |
| C  | -3.487916 | -2.876443 | 0.000000  |
| P  | 2.512143  | -1.218334 | 0.000000  |
| C  | 3.514091  | -2.792702 | 0.000000  |
| C  | -1.362554 | -3.104926 | -3.001914 |
| C  | -0.016516 | -0.710423 | -3.789774 |
| C  | -3.391731 | -0.400881 | 1.390490  |
| C  | -3.391731 | -0.400881 | -1.390490 |
| C  | 3.362517  | -0.318696 | 1.390055  |
| C  | 3.362517  | -0.318696 | -1.390055 |
| C  | -1.362554 | -3.104926 | 3.001914  |
| C  | -0.016516 | -0.710423 | 3.789774  |
| H  | 0.090474  | 6.146650  | 2.146898  |
| H  | 0.090474  | 6.146650  | -2.146898 |
| H  | 1.244215  | -3.361116 | 4.054901  |
| H  | 1.425931  | -3.976093 | 2.391952  |
| H  | 2.367037  | -2.562102 | 2.921284  |
| H  | -1.201884 | -3.398971 | 4.048998  |
| H  | -1.365204 | -4.013284 | 2.383825  |
| H  | -0.915328 | -0.087176 | 3.695184  |
| H  | -2.344104 | -2.626412 | 2.916502  |
| H  | 0.865716  | -0.063458 | 3.698433  |
| H  | -0.011640 | -1.198082 | 4.776132  |
| H  | 1.244215  | -3.361116 | -4.054901 |
| H  | 1.425931  | -3.976093 | -2.391952 |
| H  | 2.367037  | -2.562102 | -2.921284 |
| H  | -1.201884 | -3.398971 | -4.048998 |
| H  | -1.365204 | -4.013284 | -2.383825 |
| H  | -0.915328 | -0.087176 | -3.695184 |
| H  | -2.344104 | -2.626412 | -2.916502 |
| H  | 0.865716  | -0.063458 | -3.698433 |
| H  | -0.011640 | -1.198082 | -4.776132 |
| H  | -4.567342 | -2.666238 | 0.000000  |
| H  | -3.246892 | -3.473062 | 0.889225  |
| H  | -3.246892 | -3.473062 | -0.889225 |



|   |           |           |           |
|---|-----------|-----------|-----------|
| H | 4.588644  | -2.558809 | 0.000000  |
| H | 3.286157  | -3.394407 | 0.889292  |
| H | 3.286157  | -3.394407 | -0.889292 |
| H | -4.481872 | -0.513638 | 1.298315  |
| H | -3.077489 | -0.783378 | 2.368799  |
| H | -3.140502 | 0.668308  | -1.349263 |
| H | -3.140502 | 0.668308  | 1.349263  |
| H | -3.077489 | -0.783378 | -2.368799 |
| H | -4.481872 | -0.513638 | -1.298315 |
| H | 4.454862  | -0.408947 | 1.299353  |
| H | 4.454862  | -0.408947 | -1.299353 |
| H | 3.054991  | -0.705081 | 2.368954  |
| H | 3.089692  | 0.745093  | -1.346044 |
| H | 3.089692  | 0.745093  | 1.346044  |
| H | 3.054991  | -0.705081 | -2.368954 |
| H | -0.008376 | 2.422934  | -2.488010 |
| H | -0.884165 | 3.812091  | -3.151925 |
| H | 0.885624  | 3.791650  | -3.171674 |
| H | -0.916411 | 8.229466  | 0.000000  |
| H | 0.613416  | 8.225461  | -0.889868 |
| H | 0.613416  | 8.225461  | 0.889868  |
| H | -0.008376 | 2.422934  | 2.488010  |
| H | 0.885624  | 3.791650  | 3.171674  |
| H | -0.884165 | 3.812091  | 3.151925  |

**[(PMe<sub>3</sub>)<sub>4</sub>W≡Si(Mes)]<sup>+</sup> (V)  
BP86/TZ2P**

|    |           |           |           |
|----|-----------|-----------|-----------|
| C  | -0.003427 | 2.987233  | 0.000000  |
| C  | 0.001867  | 3.702129  | 1.226034  |
| C  | 0.014295  | 5.097605  | 1.199470  |
| C  | 0.019452  | 5.818156  | 0.000000  |
| C  | 0.014295  | 5.097605  | -1.199470 |
| C  | 0.001867  | 3.702129  | -1.226034 |
| C  | -0.002981 | 3.006517  | 2.564206  |
| C  | 0.005033  | 7.324690  | 0.000000  |
| C  | -0.002981 | 3.006517  | -2.564206 |
| Si | -0.003734 | 1.107475  | 0.000000  |
| W  | -0.001430 | -1.122148 | 0.000000  |
| P  | -0.000436 | -1.858739 | 2.409987  |
| C  | 1.384733  | -2.971973 | 2.968621  |
| P  | -0.000436 | -1.858739 | -2.409987 |
| C  | 1.384733  | -2.971973 | -2.968621 |
| P  | -2.495446 | -1.021973 | 0.000000  |
| C  | -3.525306 | -2.579386 | 0.000000  |
| P  | 2.492701  | -1.019995 | 0.000000  |
| C  | 3.522626  | -2.577371 | 0.000000  |
| C  | -1.383679 | -2.974415 | -2.967842 |
| C  | -0.001139 | -0.623894 | -3.784007 |
| C  | -3.335235 | -0.115707 | 1.391323  |
| C  | -3.335235 | -0.115707 | -1.391323 |
| C  | 3.332161  | -0.113465 | 1.391299  |

|   |           |           |           |
|---|-----------|-----------|-----------|
| C | 3.332161  | -0.113465 | -1.391299 |
| C | -1.383679 | -2.974415 | 2.967842  |
| C | -0.001139 | -0.623894 | 3.784007  |
| H | 0.023725  | 5.641423  | 2.146842  |
| H | 0.023725  | 5.641423  | -2.146842 |
| H | 1.216995  | -3.289843 | 4.007196  |
| H | 1.421476  | -3.868215 | 2.333903  |
| H | 2.353335  | -2.462896 | 2.907394  |
| H | -1.214679 | -3.294370 | 4.005569  |
| H | -1.420172 | -3.869269 | 2.331138  |
| H | -0.892919 | 0.010543  | 3.713729  |
| H | -2.352813 | -2.466103 | 2.908566  |
| H | 0.889438  | 0.012136  | 3.712879  |
| H | -0.000141 | -1.144515 | 4.751972  |
| H | 1.216995  | -3.289843 | -4.007196 |
| H | 1.421476  | -3.868215 | -2.333903 |
| H | 2.353335  | -2.462896 | -2.907394 |
| H | -1.214679 | -3.294370 | -4.005569 |
| H | -1.420172 | -3.869269 | -2.331138 |
| H | -0.892919 | 0.010543  | -3.713729 |
| H | -2.352813 | -2.466103 | -2.908566 |
| H | 0.889438  | 0.012136  | -3.712879 |
| H | -0.000141 | -1.144515 | -4.751972 |
| H | -4.595252 | -2.328060 | 0.000000  |
| H | -3.308198 | -3.184864 | 0.888692  |
| H | -3.308198 | -3.184864 | -0.888692 |
| H | 4.592582  | -2.326067 | 0.000000  |
| H | 3.305523  | -3.182879 | 0.888667  |
| H | 3.305523  | -3.182879 | -0.888667 |
| H | -4.427430 | -0.149898 | 1.272178  |
| H | -3.072922 | -0.547696 | 2.364841  |
| H | -3.007987 | 0.932814  | -1.382530 |
| H | -3.007987 | 0.932814  | 1.382530  |
| H | -3.072922 | -0.547696 | -2.364841 |
| H | -4.427430 | -0.149898 | -1.272178 |
| H | 4.424369  | -0.147639 | 1.272239  |
| H | 4.424369  | -0.147639 | -1.272239 |
| H | 3.069813  | -0.545212 | 2.364910  |
| H | 3.004895  | 0.935031  | -1.382157 |
| H | 3.004895  | 0.935031  | 1.382157  |
| H | 3.069813  | -0.545212 | -2.364910 |
| H | -0.004151 | 1.913804  | -2.450202 |
| H | -0.889141 | 3.284894  | -3.151341 |
| H | 0.879620  | 3.282961  | -3.157420 |
| H | -1.029684 | 7.699841  | 0.000000  |
| H | 0.499357  | 7.731892  | -0.890220 |
| H | 0.499357  | 7.731892  | 0.890220  |
| H | -0.004151 | 1.913804  | 2.450202  |
| H | 0.879620  | 3.282961  | 3.157420  |
| H | -0.889141 | 3.284894  | 3.151341  |

**PBE/TZ2P**

|    |           |           |           |
|----|-----------|-----------|-----------|
| C  | 3.116860  | 0.309497  | 0.000000  |
| C  | 3.825849  | 0.390975  | -1.225961 |
| C  | 5.211708  | 0.552379  | -1.199514 |
| C  | 5.927394  | 0.634064  | 0.000000  |
| C  | 5.211708  | 0.552379  | 1.199514  |
| C  | 3.825849  | 0.390975  | 1.225961  |
| C  | 3.131321  | 0.310643  | -2.560698 |
| C  | 3.131321  | 0.310643  | 2.560698  |
| C  | 7.425166  | 0.780718  | 0.000000  |
| Si | 1.246648  | 0.111413  | 0.000000  |
| H  | 5.752267  | 0.619905  | -2.147515 |
| H  | 5.752267  | 0.619905  | 2.147515  |
| H  | 2.046131  | 0.184324  | 2.441704  |
| H  | 3.507010  | -0.536479 | 3.152311  |
| H  | 3.302591  | 1.221389  | 3.152295  |
| H  | 2.046131  | 0.184324  | -2.441704 |
| H  | 3.302591  | 1.221389  | -3.152295 |
| H  | 3.507010  | -0.536479 | -3.152311 |
| H  | 7.909781  | -0.208118 | 0.000000  |
| H  | 7.779266  | 1.314712  | -0.890561 |
| H  | 7.779266  | 1.314712  | 0.890561  |
| W  | -0.967671 | -0.101401 | 0.000000  |
| P  | -1.680615 | -0.168013 | -2.407333 |
| C  | -2.911408 | 1.108777  | -2.971097 |
| P  | -1.680615 | -0.168013 | 2.407333  |
| C  | -2.911408 | 1.108777  | 2.971097  |
| P  | -0.583725 | -2.564293 | 0.000000  |
| C  | -2.004904 | -3.773615 | 0.000000  |
| P  | -1.050012 | 2.389874  | 0.000000  |
| C  | -2.671717 | 3.313160  | 0.000000  |
| C  | -2.650581 | -1.652454 | 2.972521  |
| C  | -0.439862 | -0.051015 | 3.769434  |
| C  | 0.416477  | -3.288180 | -1.391212 |
| C  | 0.416477  | -3.288180 | 1.391212  |
| C  | -0.202233 | 3.287476  | -1.391243 |
| C  | -0.202233 | 3.287476  | 1.391243  |
| C  | -2.650581 | -1.652454 | -2.972521 |
| C  | -0.439862 | -0.051015 | -3.769434 |
| H  | -3.212375 | 0.909702  | -4.009748 |
| H  | -3.807241 | 1.068804  | -2.334994 |
| H  | -2.487618 | 2.118438  | -2.911673 |
| H  | -2.982126 | -1.513195 | -4.011606 |
| H  | -3.538855 | -1.781137 | -2.337594 |
| H  | 0.275607  | -0.879564 | -3.692181 |
| H  | -2.045232 | -2.564870 | -2.912438 |
| H  | 0.108104  | 0.896683  | -3.692750 |
| H  | -0.951871 | -0.099722 | -4.741381 |
| H  | -3.212375 | 0.909702  | 4.009748  |
| H  | -3.807241 | 1.068804  | 2.334994  |
| H  | -2.487618 | 2.118438  | 2.911673  |

|   |           |           |           |
|---|-----------|-----------|-----------|
| H | -2.982126 | -1.513195 | 4.011606  |
| H | -3.538855 | -1.781137 | 2.337594  |
| H | 0.275607  | -0.879564 | 3.692181  |
| H | -2.045232 | -2.564870 | 2.912438  |
| H | 0.108104  | 0.896683  | 3.692750  |
| H | -0.951871 | -0.099722 | 4.741381  |
| H | -1.626678 | -4.806155 | 0.000000  |
| H | -2.631730 | -3.628771 | -0.889483 |
| H | -2.631730 | -3.628771 | 0.889483  |
| H | -2.492409 | 4.398068  | 0.000000  |
| H | -3.260603 | 3.054089  | -0.889454 |
| H | -3.260603 | 3.054089  | 0.889454  |
| H | 0.513287  | -4.377006 | -1.270735 |
| H | -0.045142 | -3.079169 | -2.364654 |
| H | 1.418700  | -2.836665 | 1.382256  |
| H | 1.418700  | -2.836665 | -1.382256 |
| H | -0.045142 | -3.079169 | 2.364654  |
| H | 0.513287  | -4.377006 | 1.270735  |
| H | -0.310554 | 4.375247  | -1.271079 |
| H | -0.310554 | 4.375247  | 1.271079  |
| H | -0.616332 | 2.995623  | -2.364757 |
| H | 0.866741  | 3.031287  | 1.381808  |
| H | 0.866741  | 3.031287  | -1.381808 |
| H | -0.616332 | 2.995623  | 2.364757  |

### PW91/TZ2P

|    |           |           |           |
|----|-----------|-----------|-----------|
| C  | -0.000945 | 2.966959  | 0.000000  |
| C  | 0.002599  | 3.679152  | 1.224731  |
| C  | 0.010137  | 5.072484  | 1.197961  |
| C  | 0.012216  | 5.790889  | 0.000000  |
| C  | 0.010137  | 5.072484  | -1.197961 |
| C  | 0.002599  | 3.679152  | -1.224731 |
| C  | 0.002544  | 2.981347  | 2.558232  |
| C  | -0.007795 | 7.293683  | 0.000000  |
| C  | 0.002544  | 2.981347  | -2.558232 |
| Si | -0.000321 | 1.090642  | 0.000000  |
| W  | -0.000449 | -1.133405 | 0.000000  |
| P  | -0.001609 | -1.850740 | 2.409339  |
| C  | 1.381223  | -2.958523 | 2.973788  |
| P  | -0.001609 | -1.850740 | -2.409339 |
| C  | 1.381223  | -2.958523 | -2.973788 |
| P  | -2.487302 | -1.005680 | 0.000000  |
| C  | -3.536870 | -2.546779 | 0.000000  |
| P  | 2.486786  | -1.007247 | 0.000000  |
| C  | 3.535087  | -2.549189 | 0.000000  |
| C  | -1.387849 | -2.954318 | -2.971478 |
| C  | -0.000385 | -0.604738 | -3.769297 |
| C  | -3.310047 | -0.087751 | 1.389980  |
| C  | -3.310047 | -0.087751 | -1.389980 |
| C  | 3.310253  | -0.089416 | 1.389564  |
| C  | 3.310253  | -0.089416 | -1.389564 |

|   |           |           |           |
|---|-----------|-----------|-----------|
| C | -1.387849 | -2.954318 | 2.971478  |
| C | -0.000385 | -0.604738 | 3.769297  |
| H | 0.018614  | 5.616473  | 2.143780  |
| H | 0.018614  | 5.616473  | -2.143780 |
| H | 1.213032  | -3.269899 | 4.013085  |
| H | 1.418350  | -3.856013 | 2.343833  |
| H | 2.347332  | -2.448305 | 2.908992  |
| H | -1.220910 | -3.268525 | 4.010119  |
| H | -1.428057 | -3.850300 | 2.339539  |
| H | -0.889711 | 0.029893  | 3.691458  |
| H | -2.352210 | -2.440555 | 2.907611  |
| H | 0.890928  | 0.027162  | 3.692081  |
| H | -0.001454 | -1.116909 | 4.740070  |
| H | 1.213032  | -3.269899 | -4.013085 |
| H | 1.418350  | -3.856013 | -2.343833 |
| H | 2.347332  | -2.448305 | -2.908992 |
| H | -1.220910 | -3.268525 | -4.010119 |
| H | -1.428057 | -3.850300 | -2.339539 |
| H | -0.889711 | 0.029893  | -3.691458 |
| H | -2.352210 | -2.440555 | -2.907611 |
| H | 0.890928  | 0.027162  | -3.692081 |
| H | -0.001454 | -1.116909 | -4.740070 |
| H | -4.601953 | -2.281720 | 0.000000  |
| H | -3.326039 | -3.152918 | 0.887728  |
| H | -3.326039 | -3.152918 | -0.887728 |
| H | 4.600394  | -2.285016 | 0.000000  |
| H | 3.323777  | -3.155162 | 0.887714  |
| H | 3.323777  | -3.155162 | -0.887714 |
| H | -4.401424 | -0.105243 | 1.271054  |
| H | -3.053079 | -0.523508 | 2.361245  |
| H | -2.966237 | 0.954178  | -1.379883 |
| H | -2.966237 | 0.954178  | 1.379883  |
| H | -3.053079 | -0.523508 | -2.361245 |
| H | -4.401424 | -0.105243 | -1.271054 |
| H | 4.401617  | -0.108047 | 1.270676  |
| H | 4.401617  | -0.108047 | -1.270676 |
| H | 3.052851  | -0.524338 | 2.361057  |
| H | 2.967542  | 0.952859  | -1.378817 |
| H | 2.967542  | 0.952859  | 1.378817  |
| H | 3.052851  | -0.524338 | -2.361057 |
| H | 0.006326  | 1.890398  | -2.440523 |
| H | -0.883010 | 3.253362  | -3.146815 |
| H | 0.883790  | 3.259552  | -3.150221 |
| H | -1.042367 | 7.664428  | 0.000000  |
| H | 0.484387  | 7.702168  | -0.889467 |
| H | 0.484387  | 7.702168  | 0.889467  |
| H | 0.006326  | 1.890398  | 2.440523  |
| H | 0.883790  | 3.259552  | 3.150221  |
| H | -0.883010 | 3.253362  | 3.146815  |

**$[(\text{PMe}_3)_4\text{W}\equiv\text{Ge}(\text{Mes})]^+$  (VI)**

**BP86/TZ2P**

|    |           |           |           |
|----|-----------|-----------|-----------|
| C  | -0.002810 | 3.062465  | 0.000000  |
| C  | 0.002857  | 3.768708  | 1.226421  |
| C  | 0.015488  | 5.166064  | 1.198533  |
| C  | 0.020770  | 5.887053  | 0.000000  |
| C  | 0.015488  | 5.166064  | -1.198533 |
| C  | 0.002857  | 3.768708  | -1.226421 |
| C  | -0.002152 | 3.078337  | 2.568192  |
| C  | 0.006792  | 7.394312  | 0.000000  |
| C  | -0.002152 | 3.078337  | -2.568192 |
| Ge | -0.003944 | 1.103362  | 0.000000  |
| W  | -0.001241 | -1.165198 | 0.000000  |
| P  | -0.000365 | -1.863153 | 2.418055  |
| C  | 1.385138  | -2.963095 | 2.998704  |
| P  | -0.000365 | -1.863153 | -2.418055 |
| C  | 1.385138  | -2.963095 | -2.998704 |
| P  | -2.497845 | -1.055000 | 0.000000  |
| C  | -3.529979 | -2.608829 | 0.000000  |
| P  | 2.495254  | -1.051687 | 0.000000  |
| C  | 3.528746  | -2.604574 | 0.000000  |
| C  | -1.384696 | -2.965032 | -2.997139 |
| C  | -0.001365 | -0.596453 | -3.763151 |
| C  | -3.332884 | -0.139968 | 1.388847  |
| C  | -3.332884 | -0.139968 | -1.388847 |
| C  | 3.329195  | -0.135644 | 1.388744  |
| C  | 3.329195  | -0.135644 | -1.388744 |
| C  | -1.384696 | -2.965032 | 2.997139  |
| C  | -0.001365 | -0.596453 | 3.763151  |
| H  | 0.024952  | 5.709411  | 2.146346  |
| H  | 0.024952  | 5.709411  | -2.146346 |
| H  | 1.220121  | -3.255754 | 4.045078  |
| H  | 1.419036  | -3.874123 | 2.385164  |
| H  | 2.354111  | -2.456734 | 2.922453  |
| H  | -1.218936 | -3.260318 | 4.042649  |
| H  | -1.418727 | -3.874441 | 2.381209  |
| H  | -0.892307 | 0.037023  | 3.675529  |
| H  | -2.353877 | -2.458740 | 2.922767  |
| H  | 0.889422  | 0.037312  | 3.676055  |
| H  | -0.001446 | -1.092372 | 4.744093  |
| H  | 1.220121  | -3.255754 | -4.045078 |
| H  | 1.419036  | -3.874123 | -2.385164 |
| H  | 2.354111  | -2.456734 | -2.922453 |
| H  | -1.218936 | -3.260318 | -4.042649 |
| H  | -1.418727 | -3.874441 | -2.381209 |
| H  | -0.892307 | 0.037023  | -3.675529 |
| H  | -2.353877 | -2.458740 | -2.922767 |
| H  | 0.889422  | 0.037312  | -3.676055 |
| H  | -0.001446 | -1.092372 | -4.744093 |
| H  | -4.599761 | -2.356812 | 0.000000  |
| H  | -3.312306 | -3.214012 | 0.888976  |
| H  | -3.312306 | -3.214012 | -0.888976 |

|   |           |           |           |
|---|-----------|-----------|-----------|
| H | 4.598317  | -2.351683 | 0.000000  |
| H | 3.311573  | -3.209953 | 0.888955  |
| H | 3.311573  | -3.209953 | -0.888955 |
| H | -4.425197 | -0.173337 | 1.271258  |
| H | -3.070099 | -0.564171 | 2.365396  |
| H | -3.004633 | 0.908100  | -1.371319 |
| H | -3.004633 | 0.908100  | 1.371319  |
| H | -3.070099 | -0.564171 | -2.365396 |
| H | -4.425197 | -0.173337 | -1.271258 |
| H | 4.421545  | -0.168439 | 1.271461  |
| H | 4.421545  | -0.168439 | -1.271461 |
| H | 3.066408  | -0.559346 | 2.365499  |
| H | 3.000352  | 0.912207  | -1.370399 |
| H | 3.000352  | 0.912207  | 1.370399  |
| H | 3.066408  | -0.559346 | -2.365499 |
| H | 0.001308  | 1.986016  | -2.461778 |
| H | -0.890574 | 3.357005  | -3.151813 |
| H | 0.877712  | 3.362424  | -3.161851 |
| H | -1.027150 | 7.771403  | 0.000000  |
| H | 0.502098  | 7.801301  | -0.889838 |
| H | 0.502098  | 7.801301  | 0.889838  |
| H | 0.001308  | 1.986016  | 2.461778  |
| H | 0.877712  | 3.362424  | 3.161851  |
| H | -0.890574 | 3.357005  | 3.151813  |

### **PBE/TZ2P**

|    |           |           |           |
|----|-----------|-----------|-----------|
| C  | 3.033580  | -0.382483 | 0.000000  |
| C  | 3.734085  | -0.457341 | -1.226729 |
| C  | 5.123402  | -0.603164 | -1.198973 |
| C  | 5.839540  | -0.680191 | 0.000000  |
| C  | 5.123402  | -0.603164 | 1.198973  |
| C  | 3.734085  | -0.457341 | 1.226729  |
| C  | 3.043616  | -0.383474 | -2.565443 |
| C  | 3.043616  | -0.383474 | 2.565443  |
| C  | 7.333714  | -0.867243 | 0.000000  |
| Ge | 1.092147  | -0.152844 | 0.000000  |
| H  | 5.665213  | -0.656080 | -2.147193 |
| H  | 5.665213  | -0.656080 | 2.147193  |
| H  | 1.956698  | -0.271865 | 2.455975  |
| H  | 3.230986  | -1.291051 | 3.157052  |
| H  | 3.412198  | 0.468768  | 3.154270  |
| H  | 1.956698  | -0.271865 | -2.455975 |
| H  | 3.412198  | 0.468768  | -3.154270 |
| H  | 3.230986  | -1.291051 | -3.157052 |
| H  | 7.588898  | -1.938247 | 0.000000  |
| H  | 7.795215  | -0.422387 | -0.890452 |
| H  | 7.795215  | -0.422387 | 0.890452  |
| W  | -1.157204 | 0.141524  | 0.000000  |
| P  | -1.846428 | 0.234109  | -2.414067 |
| C  | -2.750917 | 1.752513  | -2.994510 |
| P  | -1.846428 | 0.234109  | 2.414067  |

|   |           |           |           |
|---|-----------|-----------|-----------|
| C | -2.750917 | 1.752513  | 2.994510  |
| P | -1.352284 | -2.345718 | 0.000000  |
| C | -3.018039 | -3.182376 | 0.000000  |
| P | -0.689782 | 2.591818  | 0.000000  |
| C | -2.075537 | 3.838585  | 0.000000  |
| C | -3.118629 | -0.992971 | 2.994859  |
| C | -0.587488 | 0.064379  | 3.753664  |
| C | -0.545578 | -3.283003 | -1.389171 |
| C | -0.545578 | -3.283003 | 1.389171  |
| C | 0.335771  | 3.282682  | -1.389253 |
| C | 0.335771  | 3.282682  | 1.389253  |
| C | -3.118629 | -0.992971 | -2.994859 |
| C | -0.587488 | 0.064379  | -3.753664 |
| H | -3.065136 | 1.625977  | -4.040603 |
| H | -3.648075 | 1.908239  | -2.378193 |
| H | -2.118466 | 2.645157  | -2.919765 |
| H | -3.386719 | -0.789572 | -4.041683 |
| H | -4.026154 | -0.906028 | -2.380194 |
| H | -0.078379 | -0.903592 | -3.662393 |
| H | -2.743885 | -2.020607 | -2.918144 |
| H | 0.158947  | 0.863884  | -3.663903 |
| H | -1.077616 | 0.129229  | -4.736003 |
| H | -3.065136 | 1.625977  | 4.040603  |
| H | -3.648075 | 1.908239  | 2.378193  |
| H | -2.118466 | 2.645157  | 2.919765  |
| H | -3.386719 | -0.789572 | 4.041683  |
| H | -4.026154 | -0.906028 | 2.380194  |
| H | -0.078379 | -0.903592 | 3.662393  |
| H | -2.743885 | -2.020607 | 2.918144  |
| H | 0.158947  | 0.863884  | 3.663903  |
| H | -1.077616 | 0.129229  | 4.736003  |
| H | -2.897282 | -4.275395 | 0.000000  |
| H | -3.592163 | -2.891742 | -0.889454 |
| H | -3.592163 | -2.891742 | 0.889454  |
| H | -1.670458 | 4.860924  | 0.000000  |
| H | -2.705996 | 3.709826  | -0.889478 |
| H | -2.705996 | 3.709826  | 0.889478  |
| H | -0.712427 | -4.363722 | -1.272865 |
| H | -0.934408 | -2.967514 | -2.365449 |
| H | 0.535312  | -3.084075 | 1.369976  |
| H | 0.535312  | -3.084075 | -1.369976 |
| H | -0.934408 | -2.967514 | 2.365449  |
| H | -0.712427 | -4.363722 | 1.272865  |
| H | 0.459920  | 4.369171  | -1.273397 |
| H | 0.459920  | 4.369171  | 1.273397  |
| H | -0.122433 | 3.080435  | -2.365475 |
| H | 1.326002  | 2.805841  | 1.369786  |
| H | 1.326002  | 2.805841  | -1.369786 |
| H | -0.122433 | 3.080435  | 2.365475  |

**PW91/TZ2P**



|    |           |           |           |
|----|-----------|-----------|-----------|
| C  | -0.000092 | 3.050041  | 0.000000  |
| C  | 0.003704  | 3.752656  | 1.225507  |
| C  | 0.011148  | 5.147256  | 1.197575  |
| C  | 0.013301  | 5.865756  | 0.000000  |
| C  | 0.011148  | 5.147256  | -1.197575 |
| C  | 0.003704  | 3.752656  | -1.225507 |
| C  | 0.003486  | 3.058663  | 2.562036  |
| C  | -0.005142 | 7.368980  | 0.000000  |
| C  | 0.003486  | 3.058663  | -2.562036 |
| Ge | -0.002221 | 1.097682  | 0.000000  |
| W  | -0.001168 | -1.168179 | 0.000000  |
| P  | -0.000983 | -1.856445 | 2.414515  |
| C  | 1.381108  | -2.955074 | 2.995876  |
| P  | -0.000983 | -1.856445 | -2.414515 |
| C  | 1.381108  | -2.955074 | -2.995876 |
| P  | -2.490513 | -1.045050 | 0.000000  |
| C  | -3.529140 | -2.591399 | 0.000000  |
| P  | 2.488204  | -1.044486 | 0.000000  |
| C  | 3.525480  | -2.591717 | 0.000000  |
| C  | -1.384463 | -2.951604 | -2.996975 |
| C  | 0.003089  | -0.583492 | -3.749264 |
| C  | -3.316507 | -0.125058 | 1.386383  |
| C  | -3.316507 | -0.125058 | -1.386383 |
| C  | 3.314775  | -0.125311 | 1.386627  |
| C  | 3.314775  | -0.125311 | -1.386627 |
| C  | -1.384463 | -2.951604 | 2.996975  |
| C  | 0.003089  | -0.583492 | 3.749264  |
| H  | 0.020219  | 5.691021  | 2.143631  |
| H  | 0.020219  | 5.691021  | -2.143631 |
| H  | 1.215389  | -3.244498 | 4.041855  |
| H  | 1.412304  | -3.865405 | 2.384402  |
| H  | 2.349059  | -2.450540 | 2.917475  |
| H  | -1.216990 | -3.244180 | 4.041794  |
| H  | -1.420097 | -3.860306 | 2.383295  |
| H  | -0.884851 | 0.051146  | 3.656793  |
| H  | -2.351119 | -2.443942 | 2.922371  |
| H  | 0.894948  | 0.045093  | 3.656615  |
| H  | 0.001705  | -1.073976 | 4.731221  |
| H  | 1.215389  | -3.244498 | -4.041855 |
| H  | 1.412304  | -3.865405 | -2.384402 |
| H  | 2.349059  | -2.450540 | -2.917475 |
| H  | -1.216990 | -3.244180 | -4.041794 |
| H  | -1.420097 | -3.860306 | -2.383295 |
| H  | -0.884851 | 0.051146  | -3.656793 |
| H  | -2.351119 | -2.443942 | -2.922371 |
| H  | 0.894948  | 0.045093  | -3.656615 |
| H  | 0.001705  | -1.073976 | -4.731221 |
| H  | -4.596055 | -2.334040 | 0.000000  |
| H  | -3.313238 | -3.195562 | 0.887879  |
| H  | -3.313238 | -3.195562 | -0.887879 |
| H  | 4.592663  | -2.335485 | 0.000000  |
| H  | 3.308898  | -3.195689 | 0.887859  |

|   |           |           |           |
|---|-----------|-----------|-----------|
| H | 3.308898  | -3.195689 | -0.887859 |
| H | -4.407635 | -0.150026 | 1.267748  |
| H | -3.056901 | -0.551444 | 2.361418  |
| H | -2.979088 | 0.918658  | -1.368106 |
| H | -2.979088 | 0.918658  | 1.368106  |
| H | -3.056901 | -0.551444 | -2.361418 |
| H | -4.407635 | -0.150026 | -1.267748 |
| H | 4.405916  | -0.151634 | 1.268376  |
| H | 4.405916  | -0.151634 | -1.268376 |
| H | 3.054313  | -0.551446 | 2.361557  |
| H | 2.978817  | 0.918923  | -1.368294 |
| H | 2.978817  | 0.918923  | 1.368294  |
| H | 3.054313  | -0.551446 | -2.361557 |
| H | 0.012487  | 1.968035  | -2.451730 |
| H | -0.884652 | 3.329774  | -3.147088 |
| H | 0.881482  | 3.344268  | -3.155233 |
| H | -1.038643 | 7.742224  | 0.000000  |
| H | 0.488284  | 7.776791  | -0.889076 |
| H | 0.488284  | 7.776791  | 0.889076  |
| H | 0.012487  | 1.968035  | 2.451730  |
| H | 0.881482  | 3.344268  | 3.155233  |
| H | -0.884652 | 3.329774  | 3.147088  |

**Non-relativistic at BP86**

|    |           |           |           |
|----|-----------|-----------|-----------|
| C  | -0.002375 | 3.032365  | 0.000000  |
| C  | 0.011472  | 3.735150  | 1.229928  |
| C  | 0.043144  | 5.131462  | 1.200730  |
| C  | 0.058390  | 5.851387  | 0.000000  |
| C  | 0.043144  | 5.131462  | -1.200730 |
| C  | 0.011472  | 3.735150  | -1.229928 |
| C  | -0.005813 | 3.037444  | 2.565855  |
| C  | 0.064812  | 7.357732  | 0.000000  |
| C  | -0.005813 | 3.037444  | -2.565855 |
| Ge | -0.017629 | 1.075777  | 0.000000  |
| H  | 0.059444  | 5.675886  | 2.147630  |
| H  | 0.059444  | 5.675886  | -2.147630 |
| H  | -0.017792 | 1.944969  | -2.450602 |
| H  | -0.892118 | 3.321376  | -3.149884 |
| H  | 0.876874  | 3.301743  | -3.164156 |
| H  | -0.965109 | 7.746177  | 0.000000  |
| H  | 0.563809  | 7.759031  | -0.890213 |
| H  | 0.563809  | 7.759031  | 0.890213  |
| H  | -0.017792 | 1.944969  | 2.450602  |
| H  | 0.876874  | 3.301743  | 3.164156  |
| H  | -0.892118 | 3.321376  | 3.149884  |
| W  | -0.004743 | -1.184188 | 0.000000  |
| P  | -0.000083 | -1.810478 | 2.388202  |
| C  | 1.387885  | -2.875086 | 2.978561  |
| P  | -0.000083 | -1.810478 | -2.388202 |
| C  | 1.387885  | -2.875086 | -2.978561 |
| P  | -2.449871 | -1.079701 | 0.000000  |

|   |           |           |           |
|---|-----------|-----------|-----------|
| C | -3.452729 | -2.626150 | 0.000000  |
| P | 2.438491  | -1.040398 | 0.000000  |
| C | 3.465807  | -2.570727 | 0.000000  |
| C | -1.370261 | -2.898186 | -2.977616 |
| C | -0.011330 | -0.516118 | -3.682346 |
| C | -3.286479 | -0.172246 | 1.368924  |
| C | -3.286479 | -0.172246 | -1.368924 |
| C | 3.260324  | -0.119222 | 1.368686  |
| C | 3.260324  | -0.119222 | -1.368686 |
| C | -1.370261 | -2.898186 | 2.977616  |
| C | -0.011330 | -0.516118 | 3.682346  |
| H | 1.220732  | -3.116753 | 4.038482  |
| H | 1.414724  | -3.812323 | 2.406130  |
| H | 2.357793  | -2.378326 | 2.875158  |
| H | -1.198324 | -3.139368 | 4.036871  |
| H | -1.382907 | -3.834558 | 2.403277  |
| H | -0.905235 | 0.108866  | 3.572127  |
| H | -2.347999 | -2.416584 | 2.876054  |
| H | 0.873226  | 0.122242  | 3.573813  |
| H | -0.008650 | -0.983887 | 4.677743  |
| H | 1.220732  | -3.116753 | -4.038482 |
| H | 1.414724  | -3.812323 | -2.406130 |
| H | 2.357793  | -2.378326 | -2.875158 |
| H | -1.198324 | -3.139368 | -4.036871 |
| H | -1.382907 | -3.834558 | -2.403277 |
| H | -0.905235 | 0.108866  | -3.572127 |
| H | -2.347999 | -2.416584 | -2.876054 |
| H | 0.873226  | 0.122242  | -3.573813 |
| H | -0.008650 | -0.983887 | -4.677743 |
| H | -4.520405 | -2.359808 | 0.000000  |
| H | -3.236308 | -3.233718 | 0.886011  |
| H | -3.236308 | -3.233718 | -0.886011 |
| H | 4.529058  | -2.287201 | 0.000000  |
| H | 3.259229  | -3.181710 | 0.886016  |
| H | 3.259229  | -3.181710 | -0.886016 |
| H | -4.375637 | -0.249246 | 1.237451  |
| H | -3.012493 | -0.558056 | 2.356278  |
| H | -2.992418 | 0.885219  | -1.326473 |
| H | -2.992418 | 0.885219  | 1.326473  |
| H | -3.012493 | -0.558056 | -2.356278 |
| H | -4.375637 | -0.249246 | -1.237451 |
| H | 4.350592  | -0.178706 | 1.237245  |
| H | 4.350592  | -0.178706 | -1.237245 |
| H | 2.992525  | -0.508823 | 2.356239  |
| H | 2.949362  | 0.933379  | -1.325688 |
| H | 2.949362  | 0.933379  | 1.325688  |
| H | 2.992525  | -0.508823 | -2.356239 |

**[(PMe<sub>3</sub>)<sub>4</sub>W≡Sn(Mes)]<sup>+</sup> (VII)**

**BP86**

|   |          |          |          |
|---|----------|----------|----------|
| C | 0.000643 | 3.353141 | 0.000000 |
|---|----------|----------|----------|

|    |           |           |           |
|----|-----------|-----------|-----------|
| C  | 0.005492  | 4.052722  | 1.226512  |
| C  | 0.014742  | 5.451355  | 1.199235  |
| C  | 0.017228  | 6.171236  | 0.000000  |
| C  | 0.014742  | 5.451355  | -1.199235 |
| C  | 0.005492  | 4.052722  | -1.226512 |
| C  | 0.003489  | 3.366161  | 2.571884  |
| C  | -0.002217 | 7.678724  | 0.000000  |
| C  | 0.003489  | 3.366161  | -2.571884 |
| Sn | -0.002025 | 1.200537  | 0.000000  |
| W  | -0.001269 | -1.264756 | 0.000000  |
| P  | -0.001028 | -1.936865 | 2.421802  |
| C  | 1.379512  | -3.032139 | 3.024359  |
| P  | -0.001028 | -1.936865 | -2.421802 |
| C  | 1.379512  | -3.032139 | -3.024359 |
| P  | -2.496666 | -1.194882 | 0.000000  |
| C  | -3.477141 | -2.782220 | 0.000000  |
| P  | 2.494225  | -1.192774 | 0.000000  |
| C  | 3.475451  | -2.779682 | 0.000000  |
| C  | -1.379671 | -3.034926 | -3.023220 |
| C  | -0.002870 | -0.641871 | -3.741423 |
| C  | -3.367064 | -0.305722 | 1.385481  |
| C  | -3.367064 | -0.305722 | -1.385481 |
| C  | 3.364129  | -0.303025 | 1.385420  |
| C  | 3.364129  | -0.303025 | -1.385420 |
| C  | -1.379671 | -3.034926 | 3.023220  |
| C  | -0.002870 | -0.641871 | 3.741423  |
| H  | 0.023693  | 5.995554  | 2.146762  |
| H  | 0.023693  | 5.995554  | -2.146762 |
| H  | 1.213666  | -3.297109 | 4.078001  |
| H  | 1.399618  | -3.959034 | 2.434234  |
| H  | 2.354732  | -2.541219 | 2.933763  |
| H  | -1.213415 | -3.300478 | 4.076646  |
| H  | -1.398405 | -3.961384 | 2.432340  |
| H  | -0.893953 | -0.011297 | 3.634620  |
| H  | -2.355636 | -2.545390 | 2.933022  |
| H  | 0.887159  | -0.009677 | 3.635482  |
| H  | -0.002912 | -1.112517 | 4.735139  |
| H  | 1.213666  | -3.297109 | -4.078001 |
| H  | 1.399618  | -3.959034 | -2.434234 |
| H  | 2.354732  | -2.541219 | -2.933763 |
| H  | -1.213415 | -3.300478 | -4.076646 |
| H  | -1.398405 | -3.961384 | -2.432340 |
| H  | -0.893953 | -0.011297 | -3.634620 |
| H  | -2.355636 | -2.545390 | -2.933022 |
| H  | 0.887159  | -0.009677 | -3.635482 |
| H  | -0.002912 | -1.112517 | -4.735139 |
| H  | -4.554701 | -2.566601 | 0.000000  |
| H  | -3.238960 | -3.379498 | 0.888906  |
| H  | -3.238960 | -3.379498 | -0.888906 |
| H  | 4.552916  | -2.563573 | 0.000000  |
| H  | 3.237562  | -3.377095 | 0.888903  |
| H  | 3.237562  | -3.377095 | -0.888903 |

|   |           |           |           |
|---|-----------|-----------|-----------|
| H | -4.457137 | -0.397202 | 1.277481  |
| H | -3.074968 | -0.698995 | 2.366201  |
| H | -3.094457 | 0.757760  | -1.350239 |
| H | -3.094457 | 0.757760  | 1.350239  |
| H | -3.074968 | -0.698995 | -2.366201 |
| H | -4.457137 | -0.397202 | -1.277481 |
| H | 4.454244  | -0.394252 | 1.277553  |
| H | 4.454244  | -0.394252 | -1.277553 |
| H | 3.072051  | -0.696082 | 2.366217  |
| H | 3.091326  | 0.760397  | -1.349847 |
| H | 3.091326  | 0.760397  | 1.349847  |
| H | 3.072051  | -0.696082 | -2.366217 |
| H | 0.009872  | 2.270608  | -2.478003 |
| H | -0.885453 | 3.642162  | -3.155814 |
| H | 0.883764  | 3.652220  | -3.163812 |
| H | -1.037493 | 8.052055  | 0.000000  |
| H | 0.491947  | 8.087126  | -0.889815 |
| H | 0.491947  | 8.087126  | 0.889815  |
| H | 0.009872  | 2.270608  | 2.478003  |
| H | 0.883764  | 3.652220  | 3.163812  |
| H | -0.885453 | 3.642162  | 3.155814  |

**PBE**

|    |           |           |           |
|----|-----------|-----------|-----------|
| C  | 3.330760  | -0.424203 | 0.000000  |
| C  | 4.024646  | -0.501612 | -1.226779 |
| C  | 5.414386  | -0.655232 | -1.199455 |
| C  | 6.129061  | -0.735177 | 0.000000  |
| C  | 5.414386  | -0.655232 | 1.199455  |
| C  | 4.024646  | -0.501612 | 1.226779  |
| C  | 3.341144  | -0.423102 | -2.570478 |
| C  | 3.341144  | -0.423102 | 2.570478  |
| C  | 7.623055  | -0.925879 | 0.000000  |
| Sn | 1.199236  | -0.161285 | 0.000000  |
| H  | 5.956978  | -0.709922 | -2.147319 |
| H  | 5.956978  | -0.709922 | 2.147319  |
| H  | 2.251358  | -0.303314 | 2.477704  |
| H  | 3.523651  | -1.332260 | 3.160852  |
| H  | 3.717674  | 0.426859  | 3.157210  |
| H  | 2.251358  | -0.303314 | -2.477704 |
| H  | 3.717674  | 0.426859  | -3.157210 |
| H  | 3.523651  | -1.332260 | -3.160852 |
| H  | 7.876672  | -1.997270 | 0.000000  |
| H  | 8.086061  | -0.482119 | -0.890248 |
| H  | 8.086061  | -0.482119 | 0.890248  |
| W  | -1.243729 | 0.154913  | 0.000000  |
| P  | -1.892995 | 0.239941  | -2.419714 |
| C  | -2.796148 | 1.748282  | -3.030090 |
| P  | -1.892995 | 0.239941  | 2.419714  |
| C  | -2.796148 | 1.748282  | 3.030090  |
| P  | -1.467826 | -2.327704 | 0.000000  |
| C  | -3.156246 | -3.118509 | 0.000000  |
| P  | -0.825255 | 2.612011  | 0.000000  |

|             |           |           |           |
|-------------|-----------|-----------|-----------|
| C           | -2.255521 | 3.807971  | 0.000000  |
| C           | -3.150954 | -0.988520 | 3.029857  |
| C           | -0.595014 | 0.070803  | 3.723710  |
| C           | -0.683849 | -3.292736 | -1.385005 |
| C           | -0.683849 | -3.292736 | 1.385005  |
| C           | 0.179344  | 3.344458  | -1.384998 |
| C           | 0.179344  | 3.344458  | 1.384998  |
| C           | -3.150954 | -0.988520 | -3.029857 |
| C           | -0.595014 | 0.070803  | -3.723710 |
| H           | -3.074124 | 1.615190  | -4.085558 |
| H           | -3.716029 | 1.888314  | -2.444177 |
| H           | -2.183160 | 2.652151  | -2.936600 |
| H           | -3.385310 | -0.789992 | -4.085640 |
| H           | -4.076376 | -0.888858 | -2.444426 |
| H           | -0.084852 | -0.894067 | -3.607355 |
| H           | -2.788695 | -2.018707 | -2.935212 |
| H           | 0.144538  | 0.873694  | -3.608863 |
| H           | -1.051330 | 0.129087  | -4.723040 |
| H           | -3.074124 | 1.615190  | 4.085558  |
| H           | -3.716029 | 1.888314  | 2.444177  |
| H           | -2.183160 | 2.652151  | 2.936600  |
| H           | -3.385310 | -0.789992 | 4.085640  |
| H           | -4.076376 | -0.888858 | 2.444426  |
| H           | -0.084852 | -0.894067 | 3.607355  |
| H           | -2.788695 | -2.018707 | 2.935212  |
| H           | 0.144538  | 0.873694  | 3.608863  |
| H           | -1.051330 | 0.129087  | 4.723040  |
| H           | -3.066693 | -4.214303 | 0.000000  |
| H           | -3.721276 | -2.811071 | -0.889526 |
| H           | -3.721276 | -2.811071 | 0.889526  |
| H           | -1.889016 | 4.844533  | 0.000000  |
| H           | -2.880341 | 3.655072  | -0.889527 |
| H           | -2.880341 | 3.655072  | 0.889527  |
| H           | -0.901964 | -4.365372 | -1.278414 |
| H           | -1.038185 | -2.954104 | -2.366146 |
| H           | 0.404690  | -3.144649 | 1.345823  |
| H           | 0.404690  | -3.144649 | -1.345823 |
| H           | -1.038185 | -2.954104 | 2.366146  |
| H           | -0.901964 | -4.365372 | 1.278414  |
| H           | 0.242479  | 4.437252  | -1.278672 |
| H           | 0.242479  | 4.437252  | 1.278672  |
| H           | -0.249727 | 3.107297  | -2.366076 |
| H           | 1.193949  | 2.923261  | 1.345649  |
| H           | 1.193949  | 2.923261  | -1.345649 |
| H           | -0.249727 | 3.107297  | 2.366076  |
| <b>PW91</b> |           |           |           |
| C           | 0.001258  | 3.336633  | 0.000000  |
| C           | 0.016696  | 4.032654  | 1.225489  |
| C           | 0.049013  | 5.428918  | 1.198163  |
| C           | 0.064074  | 6.146729  | 0.000000  |
| C           | 0.049013  | 5.428918  | -1.198163 |

|    |           |           |           |
|----|-----------|-----------|-----------|
| C  | 0.016696  | 4.032654  | -1.225489 |
| C  | 0.002342  | 3.344431  | 2.566904  |
| C  | 0.070305  | 7.650730  | 0.000000  |
| C  | 0.002342  | 3.344431  | -2.566904 |
| Sn | -0.016920 | 1.190741  | 0.000000  |
| W  | -0.005034 | -1.270533 | 0.000000  |
| P  | 0.000042  | -1.927257 | 2.418240  |
| C  | 1.389838  | -3.000926 | 3.028734  |
| P  | 0.000042  | -1.927257 | -2.418240 |
| C  | 1.389838  | -3.000926 | -3.028734 |
| P  | -2.493736 | -1.204529 | 0.000000  |
| C  | -3.469679 | -2.791298 | 0.000000  |
| P  | 2.482413  | -1.159604 | 0.000000  |
| C  | 3.488478  | -2.727475 | 0.000000  |
| C  | -1.365525 | -3.032998 | -3.024091 |
| C  | -0.016948 | -0.620357 | -3.720671 |
| C  | -3.360995 | -0.315376 | 1.382961  |
| C  | -3.360995 | -0.315376 | -1.382961 |
| C  | 3.333308  | -0.253854 | 1.382576  |
| C  | 3.333308  | -0.253854 | -1.382576 |
| C  | -1.365525 | -3.032998 | 3.024091  |
| C  | -0.016948 | -0.620357 | 3.720671  |
| H  | 0.066811  | 5.973042  | 2.144192  |
| H  | 0.066811  | 5.973042  | -2.144192 |
| H  | 1.224674  | -3.261034 | 4.082545  |
| H  | 1.420809  | -3.929021 | 2.443968  |
| H  | 2.357945  | -2.499633 | 2.936356  |
| H  | -1.196482 | -3.290628 | 4.077896  |
| H  | -1.373958 | -3.960895 | 2.438207  |
| H  | -0.912829 | -0.001019 | 3.603503  |
| H  | -2.344770 | -2.554039 | 2.930434  |
| H  | 0.866109  | 0.017782  | 3.607174  |
| H  | -0.013976 | -1.079429 | 4.718254  |
| H  | 1.224674  | -3.261034 | -4.082545 |
| H  | 1.420809  | -3.929021 | -2.443968 |
| H  | 2.357945  | -2.499633 | -2.936356 |
| H  | -1.196482 | -3.290628 | -4.077896 |
| H  | -1.373958 | -3.960895 | -2.438207 |
| H  | -0.912829 | -0.001019 | -3.603503 |
| H  | -2.344770 | -2.554039 | -2.930434 |
| H  | 0.866109  | 0.017782  | -3.607174 |
| H  | -0.013976 | -1.079429 | -4.718254 |
| H  | -4.546383 | -2.578556 | 0.000000  |
| H  | -3.228602 | -3.385947 | 0.887840  |
| H  | -3.228602 | -3.385947 | -0.887840 |
| H  | 4.560931  | -2.494261 | 0.000000  |
| H  | 3.258795  | -3.326589 | 0.887883  |
| H  | 3.258795  | -3.326589 | -0.887883 |
| H  | -4.449952 | -0.404040 | 1.273534  |
| H  | -3.070353 | -0.709038 | 2.362730  |
| H  | -3.084632 | 0.745896  | -1.346828 |
| H  | -3.084632 | 0.745896  | 1.346828  |

|   |           |           |           |
|---|-----------|-----------|-----------|
| H | -3.070353 | -0.709038 | -2.362730 |
| H | -4.449952 | -0.404040 | -1.273534 |
| H | 4.423742  | -0.323501 | 1.274019  |
| H | 4.423742  | -0.323501 | -1.274019 |
| H | 3.048893  | -0.650978 | 2.362756  |
| H | 3.038766  | 0.802501  | -1.344824 |
| H | 3.038766  | 0.802501  | 1.344824  |
| H | 3.048893  | -0.650978 | -2.362756 |
| H | -0.007013 | 2.250071  | -2.472311 |
| H | -0.882706 | 3.631803  | -3.148884 |
| H | 0.884240  | 3.616576  | -3.160641 |
| H | -0.957102 | 8.040818  | 0.000000  |
| H | 0.570593  | 8.050419  | -0.889101 |
| H | 0.570593  | 8.050419  | 0.889101  |
| H | -0.007013 | 2.250071  | 2.472311  |
| H | 0.884240  | 3.616576  | 3.160641  |
| H | -0.882706 | 3.631803  | 3.148884  |

**$[(PMe_3)_4W \equiv Pb(Mes)]^+$  (VIII)**  
**BP86/TZ2P**

|    |           |           |           |
|----|-----------|-----------|-----------|
| C  | 0.000049  | 3.453973  | 0.000000  |
| C  | 0.006729  | 4.146214  | 1.227048  |
| C  | 0.018852  | 5.546343  | 1.199076  |
| C  | 0.023117  | 6.266081  | 0.000000  |
| C  | 0.018852  | 5.546343  | -1.199076 |
| C  | 0.006729  | 4.146214  | -1.227048 |
| C  | 0.003535  | 3.462386  | 2.574909  |
| C  | 0.007215  | 7.774074  | 0.000000  |
| C  | 0.003535  | 3.462386  | -2.574909 |
| Pb | -0.004127 | 1.221372  | 0.000000  |
| W  | -0.001258 | -1.299771 | 0.000000  |
| P  | 0.000543  | -1.954171 | 2.423972  |
| C  | 1.379350  | -3.049144 | 3.032871  |
| P  | 0.000543  | -1.954171 | -2.423972 |
| C  | 1.379350  | -3.049144 | -3.032871 |
| P  | -2.497100 | -1.242798 | 0.000000  |
| C  | -3.462415 | -2.839480 | 0.000000  |
| P  | 2.494433  | -1.237126 | 0.000000  |
| C  | 3.463119  | -2.831771 | 0.000000  |
| C  | -1.376921 | -3.049076 | -3.035571 |
| C  | 0.002483  | -0.652407 | -3.738778 |
| C  | -3.377413 | -0.359091 | 1.383565  |
| C  | -3.377413 | -0.359091 | -1.383565 |
| C  | 3.372505  | -0.351396 | 1.383625  |
| C  | 3.372505  | -0.351396 | -1.383625 |
| C  | -1.376921 | -3.049076 | 3.035571  |
| C  | 0.002483  | -0.652407 | 3.738778  |
| H  | 0.028674  | 6.090162  | 2.146979  |
| H  | 0.028674  | 6.090162  | -2.146979 |
| H  | 1.215655  | -3.304541 | 4.089170  |
| H  | 1.393289  | -3.981099 | 2.450579  |



|   |           |           |           |
|---|-----------|-----------|-----------|
| H | 2.356711  | -2.564244 | 2.935273  |
| H | -1.210884 | -3.304859 | 4.091411  |
| H | -1.392410 | -3.980821 | 2.452987  |
| H | -0.887856 | -0.021229 | 3.629276  |
| H | -2.354397 | -2.563922 | 2.940354  |
| H | 0.892691  | -0.021546 | 3.626502  |
| H | 0.004088  | -1.115166 | 4.736207  |
| H | 1.215655  | -3.304541 | -4.089170 |
| H | 1.393289  | -3.981099 | -2.450579 |
| H | 2.356711  | -2.564244 | -2.935273 |
| H | -1.210884 | -3.304859 | -4.091411 |
| H | -1.392410 | -3.980821 | -2.452987 |
| H | -0.887856 | -0.021229 | -3.629276 |
| H | -2.354397 | -2.563922 | -2.940354 |
| H | 0.892691  | -0.021546 | -3.626502 |
| H | 0.004088  | -1.115166 | -4.736207 |
| H | -4.542175 | -2.635142 | 0.000000  |
| H | -3.217778 | -3.434284 | 0.888801  |
| H | -3.217778 | -3.434284 | -0.888801 |
| H | 4.542430  | -2.625130 | 0.000000  |
| H | 3.219758  | -3.427080 | 0.888823  |
| H | 3.219758  | -3.427080 | -0.888823 |
| H | -4.466364 | -0.465631 | 1.278534  |
| H | -3.078012 | -0.741991 | 2.365955  |
| H | -3.120428 | 0.708110  | -1.341943 |
| H | -3.120428 | 0.708110  | 1.341943  |
| H | -3.078012 | -0.741991 | -2.365955 |
| H | -4.466364 | -0.465631 | -1.278534 |
| H | 4.461702  | -0.455154 | 1.278451  |
| H | 4.461702  | -0.455154 | -1.278451 |
| H | 3.074190  | -0.735135 | 2.366014  |
| H | 3.112813  | 0.715145  | -1.342080 |
| H | 3.112813  | 0.715145  | 1.342080  |
| H | 3.074190  | -0.735135 | -2.366014 |
| H | 0.005787  | 2.366982  | -2.487806 |
| H | -0.883916 | 3.744166  | -3.158314 |
| H | 0.885335  | 3.747790  | -3.164894 |
| H | -1.026749 | 8.150737  | 0.000000  |
| H | 0.502962  | 8.181138  | -0.889564 |
| H | 0.502962  | 8.181138  | 0.889564  |
| H | 0.005787  | 2.366982  | 2.487806  |
| H | 0.885335  | 3.747790  | 3.164894  |
| H | -0.883916 | 3.744166  | 3.158314  |

**PBE**

|   |          |           |           |
|---|----------|-----------|-----------|
| C | 3.427963 | -0.435946 | 0.000000  |
| C | 4.115148 | -0.511516 | -1.227196 |
| C | 5.506594 | -0.662105 | -1.199044 |
| C | 6.222033 | -0.740651 | 0.000000  |
| C | 5.506594 | -0.662105 | 1.199044  |
| C | 4.115148 | -0.511516 | 1.227196  |

|    |           |           |           |
|----|-----------|-----------|-----------|
| C  | 3.435312  | -0.435617 | -2.574277 |
| C  | 3.435312  | -0.435617 | 2.574277  |
| C  | 7.716437  | -0.930030 | 0.000000  |
| Pb | 1.219792  | -0.163810 | 0.000000  |
| H  | 6.048491  | -0.716201 | -2.147617 |
| H  | 6.048491  | -0.716201 | 2.147617  |
| H  | 2.344180  | -0.328083 | 2.490919  |
| H  | 3.631463  | -1.340825 | 3.166301  |
| H  | 3.806351  | 0.420049  | 3.156310  |
| H  | 2.344180  | -0.328083 | -2.490919 |
| H  | 3.806351  | 0.420049  | -3.156310 |
| H  | 3.631463  | -1.340825 | -3.166301 |
| H  | 7.970505  | -2.001090 | 0.000000  |
| H  | 8.177763  | -0.484625 | -0.890210 |
| H  | 8.177763  | -0.484625 | 0.890210  |
| W  | -1.275787 | 0.160193  | 0.000000  |
| P  | -1.912255 | 0.243596  | -2.421911 |
| C  | -2.814553 | 1.749863  | -3.040083 |
| P  | -1.912255 | 0.243596  | 2.421911  |
| C  | -2.814553 | 1.749863  | 3.040083  |
| P  | -1.516057 | -2.321315 | 0.000000  |
| C  | -3.213770 | -3.091051 | 0.000000  |
| P  | -0.873029 | 2.620371  | 0.000000  |
| C  | -2.317673 | 3.798277  | 0.000000  |
| C  | -3.170500 | -0.982069 | 3.038523  |
| C  | -0.608463 | 0.072208  | 3.721151  |
| C  | -0.741506 | -3.297793 | -1.382941 |
| C  | -0.741506 | -3.297793 | 1.382941  |
| C  | 0.125605  | 3.365847  | -1.383012 |
| C  | 0.125605  | 3.365847  | 1.383012  |
| C  | -3.170500 | -0.982069 | -3.038523 |
| C  | -0.608463 | 0.072208  | -3.721151 |
| H  | -3.083791 | 1.616500  | -4.097795 |
| H  | -3.740093 | 1.885079  | -2.461848 |
| H  | -2.207899 | 2.657232  | -2.941458 |
| H  | -3.396344 | -0.786051 | -4.096649 |
| H  | -4.099929 | -0.874757 | -2.460680 |
| H  | -0.098945 | -0.892423 | -3.599736 |
| H  | -2.816509 | -2.014383 | -2.938059 |
| H  | 0.131268  | 0.874416  | -3.602225 |
| H  | -1.056243 | 0.129020  | -4.724427 |
| H  | -3.083791 | 1.616500  | 4.097795  |
| H  | -3.740093 | 1.885079  | 2.461848  |
| H  | -2.207899 | 2.657232  | 2.941458  |
| H  | -3.396344 | -0.786051 | 4.096649  |
| H  | -4.099929 | -0.874757 | 2.460680  |
| H  | -0.098945 | -0.892423 | 3.599736  |
| H  | -2.816509 | -2.014383 | 2.938059  |
| H  | 0.131268  | 0.874416  | 3.602225  |
| H  | -1.056243 | 0.129020  | 4.724427  |
| H  | -3.138855 | -4.188024 | 0.000000  |
| H  | -3.775095 | -2.776517 | -0.889333 |

|   |           |           |           |
|---|-----------|-----------|-----------|
| H | -3.775095 | -2.776517 | 0.889333  |
| H | -1.965110 | 4.839744  | 0.000000  |
| H | -2.940680 | 3.637479  | -0.889347 |
| H | -2.940680 | 3.637479  | 0.889347  |
| H | -0.973428 | -4.367521 | -1.276673 |
| H | -1.087102 | -2.955769 | -2.365841 |
| H | 0.348977  | -3.165295 | 1.340578  |
| H | 0.348977  | -3.165295 | -1.340578 |
| H | -1.087102 | -2.955769 | 2.365841  |
| H | -0.973428 | -4.367521 | 1.276673  |
| H | 0.174638  | 4.459390  | -1.277403 |
| H | 0.174638  | 4.459390  | 1.277403  |
| H | -0.295604 | 3.122743  | -2.365853 |
| H | 1.146031  | 2.959182  | 1.340029  |
| H | 1.146031  | 2.959182  | -1.340029 |
| H | -0.295604 | 3.122743  | 2.365853  |

### PW91

|    |           |           |           |
|----|-----------|-----------|-----------|
| C  | 0.005804  | 3.435230  | 0.000000  |
| C  | 0.016085  | 4.124773  | 1.225902  |
| C  | 0.035298  | 5.522317  | 1.197716  |
| C  | 0.042973  | 6.240170  | 0.000000  |
| C  | 0.035298  | 5.522317  | -1.197716 |
| C  | 0.016085  | 4.124773  | -1.225902 |
| C  | 0.010034  | 3.440283  | 2.570666  |
| C  | 0.035503  | 7.744841  | 0.000000  |
| C  | 0.010034  | 3.440283  | -2.570666 |
| Pb | -0.009111 | 1.210879  | 0.000000  |
| W  | -0.002347 | -1.305295 | 0.000000  |
| P  | -0.000189 | -1.940480 | 2.420811  |
| C  | 1.382447  | -3.017774 | 3.041886  |
| P  | -0.000189 | -1.940480 | -2.420811 |
| C  | 1.382447  | -3.017774 | -3.041886 |
| P  | -2.491315 | -1.240468 | 0.000000  |
| C  | -3.460079 | -2.831684 | 0.000000  |
| P  | 2.485925  | -1.213678 | 0.000000  |
| C  | 3.472975  | -2.793712 | 0.000000  |
| C  | -1.370615 | -3.035329 | -3.038917 |
| C  | -0.010352 | -0.622326 | -3.714182 |
| C  | -3.364500 | -0.352059 | 1.380914  |
| C  | -3.364500 | -0.352059 | -1.380914 |
| C  | 3.349540  | -0.315192 | 1.380539  |
| C  | 3.349540  | -0.315192 | -1.380539 |
| C  | -1.370615 | -3.035329 | 3.038917  |
| C  | -0.010352 | -0.622326 | 3.714182  |
| H  | 0.048718  | 6.066243  | 2.144072  |
| H  | 0.048718  | 6.066243  | -2.144072 |
| H  | 1.217319  | -3.264965 | 4.098827  |
| H  | 1.403700  | -3.952724 | 2.467483  |
| H  | 2.355341  | -2.527385 | 2.942305  |
| H  | -1.204954 | -3.280204 | 4.096319  |

|   |           |           |           |
|---|-----------|-----------|-----------|
| H | -1.378462 | -3.970599 | 2.464680  |
| H | -0.903368 | 0.000127  | 3.590812  |
| H | -2.349483 | -2.557477 | 2.936811  |
| H | 0.875060  | 0.011348  | 3.593240  |
| H | -0.008855 | -1.069419 | 4.717328  |
| H | 1.217319  | -3.264965 | -4.098827 |
| H | 1.403700  | -3.952724 | -2.467483 |
| H | 2.355341  | -2.527385 | -2.942305 |
| H | -1.204954 | -3.280204 | -4.096319 |
| H | -1.378462 | -3.970599 | -2.464680 |
| H | -0.903368 | 0.000127  | -3.590812 |
| H | -2.349483 | -2.557477 | -2.936811 |
| H | 0.875060  | 0.011348  | -3.593240 |
| H | -0.008855 | -1.069419 | -4.717328 |
| H | -4.537998 | -2.624889 | 0.000000  |
| H | -3.215593 | -3.425107 | 0.887812  |
| H | -3.215593 | -3.425107 | -0.887812 |
| H | 4.548441  | -2.574507 | 0.000000  |
| H | 3.235409  | -3.389944 | 0.887815  |
| H | 3.235409  | -3.389944 | -0.887815 |
| H | -4.452841 | -0.451990 | 1.275099  |
| H | -3.067718 | -0.734761 | 2.363006  |
| H | -3.100565 | 0.712163  | -1.336964 |
| H | -3.100565 | 0.712163  | 1.336964  |
| H | -3.067718 | -0.734761 | -2.363006 |
| H | -4.452841 | -0.451990 | -1.275099 |
| H | 4.438915  | -0.403592 | 1.275021  |
| H | 4.438915  | -0.403592 | -1.275021 |
| H | 3.056626  | -0.700288 | 2.362838  |
| H | 3.074564  | 0.746231  | -1.335877 |
| H | 3.074564  | 0.746231  | 1.335877  |
| H | 3.056626  | -0.700288 | -2.362838 |
| H | 0.012044  | 2.345800  | -2.485148 |
| H | -0.877238 | 3.722079  | -3.152122 |
| H | 0.889681  | 3.725049  | -3.161960 |
| H | -0.995022 | 8.126616  | 0.000000  |
| H | 0.532833  | 8.148971  | -0.888857 |
| H | 0.532833  | 8.148971  | 0.888857  |
| H | 0.012044  | 2.345800  | 2.485148  |
| H | 0.889681  | 3.725049  | 3.161960  |
| H | -0.877238 | 3.722079  | 3.152122  |

**$[(\text{PMe}_3)_5\text{W}\equiv\text{Si}(\text{Mes})]^+$  (IX)**

**BP86/TZ2P**

|   |           |          |           |
|---|-----------|----------|-----------|
| C | -3.162738 | 0.608294 | 0.000000  |
| C | -3.876108 | 0.774077 | -1.219534 |
| C | -5.236950 | 1.083339 | -1.195536 |
| C | -5.945129 | 1.240673 | 0.000000  |
| C | -5.236950 | 1.083339 | 1.195536  |
| C | -3.876108 | 0.774077 | 1.219534  |

|    |           |           |           |
|----|-----------|-----------|-----------|
| C  | -3.206171 | 0.615345  | -2.558528 |
| C  | -7.408721 | 1.596959  | 0.000000  |
| C  | -3.206171 | 0.615345  | 2.558528  |
| Si | -1.326445 | 0.120871  | 0.000000  |
| H  | -5.763227 | 1.202435  | -2.144996 |
| H  | -5.763227 | 1.202435  | 2.144996  |
| H  | -2.299415 | 1.231360  | 2.624587  |
| H  | -3.874216 | 0.913624  | 3.374592  |
| H  | -2.908439 | -0.426545 | 2.736174  |
| H  | -7.540290 | 2.689809  | 0.000000  |
| H  | -7.917625 | 1.207598  | 0.890205  |
| H  | -7.917625 | 1.207598  | -0.890205 |
| H  | -2.299415 | 1.231360  | -2.624587 |
| H  | -2.908439 | -0.426545 | -2.736174 |
| H  | -3.874216 | 0.913624  | -3.374592 |
| W  | 0.941195  | -0.181622 | 0.000000  |
| P  | 1.239179  | -0.349437 | -2.519220 |
| C  | 2.378773  | -1.695285 | -3.136626 |
| P  | 1.239179  | -0.349437 | 2.519220  |
| C  | 2.378773  | -1.695285 | 3.136626  |
| P  | 0.903483  | 2.351447  | 0.000000  |
| C  | 2.419875  | 3.446953  | 0.000000  |
| P  | 0.514209  | -2.686949 | 0.000000  |
| C  | 1.866074  | -3.977623 | 0.000000  |
| C  | 1.908930  | 1.061244  | 3.556211  |
| C  | -0.177445 | -0.714855 | 3.664722  |
| C  | 0.002802  | 3.216946  | -1.382476 |
| C  | 0.002802  | 3.216946  | 1.382476  |
| C  | -0.504792 | -3.424851 | -1.376554 |
| C  | -0.504792 | -3.424851 | 1.376554  |
| C  | 1.908930  | 1.061244  | -3.556211 |
| C  | -0.177445 | -0.714855 | -3.664722 |
| H  | 2.433060  | -1.667249 | -4.233561 |
| H  | 3.393370  | -1.587133 | -2.736840 |
| H  | 1.997415  | -2.677475 | -2.831396 |
| H  | 2.278096  | 0.678375  | -4.517918 |
| H  | 2.714898  | 1.606457  | -3.055792 |
| H  | -0.836913 | 0.157520  | -3.708227 |
| H  | 1.094613  | 1.765063  | -3.766523 |
| H  | -0.759338 | -1.578790 | -3.329959 |
| H  | 0.211057  | -0.908662 | -4.674256 |
| H  | 2.433060  | -1.667249 | 4.233561  |
| H  | 3.393370  | -1.587133 | 2.736840  |
| H  | 1.997415  | -2.677475 | 2.831396  |
| H  | 2.278096  | 0.678375  | 4.517918  |
| H  | 2.714898  | 1.606457  | 3.055792  |
| H  | -0.836913 | 0.157520  | 3.708227  |
| H  | 1.094613  | 1.765063  | 3.766523  |
| H  | -0.759338 | -1.578790 | 3.329959  |
| H  | 0.211057  | -0.908662 | 4.674256  |
| H  | 2.119941  | 4.503739  | 0.000000  |
| H  | 3.032048  | 3.265124  | -0.892448 |

|   |           |           |           |
|---|-----------|-----------|-----------|
| H | 3.032048  | 3.265124  | 0.892448  |
| H | 1.422620  | -4.982769 | 0.000000  |
| H | 2.500730  | -3.876622 | -0.889126 |
| H | 2.500730  | -3.876622 | 0.889126  |
| H | -0.002223 | 4.301917  | -1.207656 |
| H | 0.480278  | 3.019771  | -2.347769 |
| H | -1.036291 | 2.862526  | 1.421843  |
| H | -1.036291 | 2.862526  | -1.421843 |
| H | 0.480278  | 3.019771  | 2.347769  |
| H | -0.002223 | 4.301917  | 1.207656  |
| H | -0.685595 | -4.489200 | -1.173034 |
| H | -0.685595 | -4.489200 | 1.173034  |
| H | 0.001709  | -3.341291 | -2.344975 |
| H | -1.470491 | -2.905423 | 1.436631  |
| H | -1.470491 | -2.905423 | -1.436631 |
| H | 0.001709  | -3.341291 | 2.344975  |
| P | 3.647337  | -0.152724 | 0.000000  |
| C | 4.590573  | 0.666555  | 1.379832  |
| H | 4.367243  | 1.739227  | 1.407188  |
| H | 4.356354  | 0.232575  | 2.356864  |
| H | 5.665004  | 0.539618  | 1.189368  |
| H | 4.287129  | -2.367797 | 0.887360  |
| C | 4.547557  | -1.780173 | 0.000000  |
| H | 4.287129  | -2.367797 | -0.887360 |
| H | 5.630727  | -1.595854 | 0.000000  |
| H | 5.665004  | 0.539618  | -1.189368 |
| C | 4.590573  | 0.666555  | -1.379832 |
| H | 4.367243  | 1.739227  | -1.407188 |
| H | 4.356354  | 0.232575  | -2.356864 |

**[(PMe<sub>3</sub>)<sub>5</sub>W≡Ge(Mes)]<sup>+</sup> (X)  
BP86/TZ2P**

|    |           |           |           |
|----|-----------|-----------|-----------|
| C  | -3.247620 | 0.626021  | 0.000000  |
| C  | -3.954678 | 0.778278  | -1.219704 |
| C  | -5.325045 | 1.051424  | -1.195439 |
| C  | -6.037765 | 1.186149  | 0.000000  |
| C  | -5.325045 | 1.051424  | 1.195439  |
| C  | -3.954678 | 0.778278  | 1.219704  |
| C  | -3.277389 | 0.649351  | -2.559169 |
| C  | -7.511160 | 1.502947  | 0.000000  |
| C  | -3.277389 | 0.649351  | 2.559169  |
| Ge | -1.325828 | 0.136117  | 0.000000  |
| H  | -5.852657 | 1.165058  | -2.145154 |
| H  | -5.852657 | 1.165058  | 2.145154  |
| H  | -2.337267 | 1.215773  | 2.585227  |
| H  | -3.918342 | 1.026383  | 3.364487  |
| H  | -3.037241 | -0.397542 | 2.790028  |
| H  | -7.674500 | 2.591470  | 0.000000  |
| H  | -8.009276 | 1.098876  | 0.889794  |
| H  | -8.009276 | 1.098876  | -0.889794 |
| H  | -2.337267 | 1.215773  | -2.585227 |

|   |           |           |           |
|---|-----------|-----------|-----------|
| H | -3.037241 | -0.397542 | -2.790028 |
| H | -3.918342 | 1.026383  | -3.364487 |
| W | 0.980721  | -0.176041 | 0.000000  |
| P | 1.245466  | -0.343597 | -2.519537 |
| C | 2.353867  | -1.705069 | -3.155335 |
| P | 1.245466  | -0.343597 | 2.519537  |
| C | 2.353867  | -1.705069 | 3.155335  |
| P | 0.950886  | 2.362878  | 0.000000  |
| C | 2.467322  | 3.454179  | 0.000000  |
| P | 0.517449  | -2.681419 | 0.000000  |
| C | 1.850382  | -3.989823 | 0.000000  |
| C | 1.918964  | 1.055177  | 3.568930  |
| C | -0.203751 | -0.680150 | 3.632222  |
| C | 0.048396  | 3.227957  | -1.382167 |
| C | 0.048396  | 3.227957  | 1.382167  |
| C | -0.517232 | -3.404088 | -1.373750 |
| C | -0.517232 | -3.404088 | 1.373750  |
| C | 1.918964  | 1.055177  | -3.568930 |
| C | -0.203751 | -0.680150 | -3.632222 |
| H | 2.380581  | -1.685695 | -4.253497 |
| H | 3.379085  | -1.600553 | -2.781782 |
| H | 1.973608  | -2.681863 | -2.832324 |
| H | 2.254529  | 0.665635  | -4.540218 |
| H | 2.749797  | 1.581074  | -3.088823 |
| H | -0.846803 | 0.205417  | -3.654313 |
| H | 1.114980  | 1.776725  | -3.757631 |
| H | -0.794902 | -1.532422 | -3.284537 |
| H | 0.153308  | -0.878067 | -4.652671 |
| H | 2.380581  | -1.685695 | 4.253497  |
| H | 3.379085  | -1.600553 | 2.781782  |
| H | 1.973608  | -2.681863 | 2.832324  |
| H | 2.254529  | 0.665635  | 4.540218  |
| H | 2.749797  | 1.581074  | 3.088823  |
| H | -0.846803 | 0.205417  | 3.654313  |
| H | 1.114980  | 1.776725  | 3.757631  |
| H | -0.794902 | -1.532422 | 3.284537  |
| H | 0.153308  | -0.878067 | 4.652671  |
| H | 2.169235  | 4.511599  | 0.000000  |
| H | 3.078930  | 3.270472  | -0.892491 |
| H | 3.078930  | 3.270472  | 0.892491  |
| H | 1.391998  | -4.988270 | 0.000000  |
| H | 2.486011  | -3.896885 | -0.889232 |
| H | 2.486011  | -3.896885 | 0.889232  |
| H | 0.031908  | 4.311458  | -1.199771 |
| H | 0.533237  | 3.042823  | -2.346091 |
| H | -0.986971 | 2.864109  | 1.430996  |
| H | -0.986971 | 2.864109  | -1.430996 |
| H | 0.533237  | 3.042823  | 2.346091  |
| H | 0.031908  | 4.311458  | 1.199771  |
| H | -0.704401 | -4.467733 | -1.172572 |
| H | -0.704401 | -4.467733 | 1.172572  |
| H | -0.020245 | -3.320275 | -2.346849 |

|   |           |           |           |
|---|-----------|-----------|-----------|
| H | -1.480157 | -2.878357 | 1.421944  |
| H | -1.480157 | -2.878357 | -1.421944 |
| H | -0.020245 | -3.320275 | 2.346849  |
| P | 3.657908  | -0.178735 | 0.000000  |
| C | 4.601919  | 0.635080  | 1.382029  |
| H | 4.378128  | 1.707650  | 1.414004  |
| H | 4.366160  | 0.196462  | 2.356841  |
| H | 5.676615  | 0.508558  | 1.192466  |
| H | 4.280432  | -2.397423 | 0.887835  |
| C | 4.545716  | -1.812206 | 0.000000  |
| H | 4.280432  | -2.397423 | -0.887835 |
| H | 5.630258  | -1.635741 | 0.000000  |
| H | 5.676615  | 0.508558  | -1.192466 |
| C | 4.601919  | 0.635080  | -1.382029 |
| H | 4.378128  | 1.707650  | -1.414004 |
| H | 4.366160  | 0.196462  | -2.356841 |

**[(PMe<sub>3</sub>)<sub>5</sub>W≡Sn(Mes)]<sup>+</sup> (XI)**  
**BP86/TZ2P**

|    |           |           |           |
|----|-----------|-----------|-----------|
| C  | -3.546582 | 0.636228  | 0.000000  |
| C  | -4.244678 | 0.773042  | -1.221033 |
| C  | -5.617784 | 1.036713  | -1.198010 |
| C  | -6.328030 | 1.171584  | 0.000000  |
| C  | -5.617784 | 1.036713  | 1.198010  |
| C  | -4.244678 | 0.773042  | 1.221033  |
| C  | -3.552385 | 0.640797  | -2.555688 |
| C  | -7.803625 | 1.479419  | 0.000000  |
| C  | -3.552385 | 0.640797  | 2.555688  |
| Sn | -1.424587 | 0.152696  | 0.000000  |
| H  | -6.150343 | 1.136529  | -2.146616 |
| H  | -6.150343 | 1.136529  | 2.146616  |
| H  | -2.737205 | 1.372145  | 2.658030  |
| H  | -4.249076 | 0.809432  | 3.384903  |
| H  | -3.118090 | -0.359935 | 2.688921  |
| H  | -7.973440 | 2.566904  | 0.000000  |
| H  | -8.299149 | 1.072095  | 0.889745  |
| H  | -8.299149 | 1.072095  | -0.889745 |
| H  | -2.737205 | 1.372145  | -2.658030 |
| H  | -3.118090 | -0.359935 | -2.688921 |
| H  | -4.249076 | 0.809432  | -3.384903 |
| W  | 1.083312  | -0.175361 | 0.000000  |
| P  | 1.297171  | -0.324968 | -2.516337 |
| C  | 2.339614  | -1.714315 | -3.202231 |
| P  | 1.297171  | -0.324968 | 2.516337  |
| C  | 2.339614  | -1.714315 | 3.202231  |
| P  | 1.097218  | 2.364822  | 0.000000  |
| C  | 2.638590  | 3.421192  | 0.000000  |
| P  | 0.592649  | -2.678987 | 0.000000  |
| C  | 1.910924  | -4.002634 | 0.000000  |
| C  | 1.997664  | 1.053740  | 3.574648  |
| C  | -0.212769 | -0.583136 | 3.568763  |



|   |           |           |           |
|---|-----------|-----------|-----------|
| C | 0.221830  | 3.257769  | -1.383459 |
| C | 0.221830  | 3.257769  | 1.383459  |
| C | -0.448721 | -3.399327 | -1.371903 |
| C | -0.448721 | -3.399327 | 1.371903  |
| C | 1.997664  | 1.053740  | -3.574648 |
| C | -0.212769 | -0.583136 | -3.568763 |
| H | 2.301724  | -1.709013 | -4.300255 |
| H | 3.386781  | -1.611058 | -2.892240 |
| H | 1.975298  | -2.683941 | -2.842534 |
| H | 2.311748  | 0.651035  | -4.547654 |
| H | 2.850383  | 1.553462  | -3.104438 |
| H | -0.849890 | 0.305154  | -3.484551 |
| H | 1.215011  | 1.799290  | -3.758682 |
| H | -0.784843 | -1.455389 | -3.237259 |
| H | 0.073096  | -0.715868 | -4.622173 |
| H | 2.301724  | -1.709013 | 4.300255  |
| H | 3.386781  | -1.611058 | 2.892240  |
| H | 1.975298  | -2.683941 | 2.842534  |
| H | 2.311748  | 0.651035  | 4.547654  |
| H | 2.850383  | 1.553462  | 3.104438  |
| H | -0.849890 | 0.305154  | 3.484551  |
| H | 1.215011  | 1.799290  | 3.758682  |
| H | -0.784843 | -1.455389 | 3.237259  |
| H | 0.073096  | -0.715868 | 4.622173  |
| H | 2.364280  | 4.484737  | 0.000000  |
| H | 3.245623  | 3.223473  | -0.892287 |
| H | 3.245623  | 3.223473  | 0.892287  |
| H | 1.440746  | -4.995243 | 0.000000  |
| H | 2.547270  | -3.917004 | -0.889222 |
| H | 2.547270  | -3.917004 | 0.889222  |
| H | 0.222678  | 4.339770  | -1.191544 |
| H | 0.714898  | 3.072977  | -2.343144 |
| H | -0.818856 | 2.912100  | 1.450626  |
| H | -0.818856 | 2.912100  | -1.450626 |
| H | 0.714898  | 3.072977  | 2.343144  |
| H | 0.222678  | 4.339770  | 1.191544  |
| H | -0.615717 | -4.468834 | -1.184168 |
| H | -0.615717 | -4.468834 | 1.184168  |
| H | 0.029854  | -3.292057 | -2.351673 |
| H | -1.421684 | -2.890305 | 1.398701  |
| H | -1.421684 | -2.890305 | -1.398701 |
| H | 0.029854  | -3.292057 | 2.351673  |
| P | 3.719809  | -0.233418 | 0.000000  |
| C | 4.682341  | 0.554791  | 1.384678  |
| H | 4.483294  | 1.631829  | 1.426199  |
| H | 4.437938  | 0.113162  | 2.356470  |
| H | 5.753863  | 0.405559  | 1.193243  |
| H | 4.305582  | -2.461553 | 0.889055  |
| C | 4.579240  | -1.881800 | 0.000000  |
| H | 4.305582  | -2.461553 | -0.889055 |
| H | 5.666428  | -1.722171 | 0.000000  |
| H | 5.753863  | 0.405559  | -1.193243 |

|   |          |          |           |
|---|----------|----------|-----------|
| C | 4.682341 | 0.554791 | -1.384678 |
| H | 4.483294 | 1.631829 | -1.426199 |
| H | 4.437938 | 0.113162 | -2.356470 |

**[(PMe<sub>3</sub>)<sub>5</sub>W≡Pb(Mes)]<sup>+</sup> (XII)**

**BP86/TZ2P**

|    |           |           |           |
|----|-----------|-----------|-----------|
| C  | -3.654005 | 0.627506  | 0.000000  |
| C  | -4.346628 | 0.748585  | -1.221576 |
| C  | -5.726360 | 0.983717  | -1.198544 |
| C  | -6.438429 | 1.104174  | 0.000000  |
| C  | -5.726360 | 0.983717  | 1.198544  |
| C  | -4.346628 | 0.748585  | 1.221576  |
| C  | -3.647211 | 0.630764  | -2.554773 |
| C  | -7.920701 | 1.381113  | 0.000000  |
| C  | -3.647211 | 0.630764  | 2.554773  |
| Pb | -1.442161 | 0.173933  | 0.000000  |
| H  | -6.261356 | 1.071877  | -2.147107 |
| H  | -6.261356 | 1.071877  | 2.147107  |
| H  | -2.860361 | 1.391979  | 2.663400  |
| H  | -4.348435 | 0.765918  | 3.386352  |
| H  | -3.176342 | -0.354659 | 2.679557  |
| H  | -8.114051 | 2.464596  | 0.000000  |
| H  | -8.407663 | 0.963026  | 0.889506  |
| H  | -8.407663 | 0.963026  | -0.889506 |
| H  | -2.860361 | 1.391979  | -2.663400 |
| H  | -3.176342 | -0.354659 | -2.679557 |
| H  | -4.348435 | 0.765918  | -3.386352 |
| W  | 1.124399  | -0.169439 | 0.000000  |
| P  | 1.311635  | -0.316021 | -2.516206 |
| C  | 2.320475  | -1.723319 | -3.217003 |
| P  | 1.311635  | -0.316021 | 2.516206  |
| C  | 2.320475  | -1.723319 | 3.217003  |
| P  | 1.171991  | 2.370267  | 0.000000  |
| C  | 2.728507  | 3.404246  | 0.000000  |
| P  | 0.602536  | -2.673248 | 0.000000  |
| C  | 1.899791  | -4.018142 | 0.000000  |
| C  | 2.028760  | 1.048892  | 3.581958  |
| C  | -0.217200 | -0.540467 | 3.552290  |
| C  | 0.311304  | 3.279130  | -1.383028 |
| C  | 0.311304  | 3.279130  | 1.383028  |
| C  | -0.451519 | -3.381135 | -1.370423 |
| C  | -0.451519 | -3.381135 | 1.370423  |
| C  | 2.028760  | 1.048892  | -3.581958 |
| C  | -0.217200 | -0.540467 | -3.552290 |
| H  | 2.256046  | -1.727705 | -4.313815 |
| H  | 3.375766  | -1.625261 | -2.933484 |
| H  | 1.958183  | -2.686464 | -2.838916 |
| H  | 2.329181  | 0.639303  | -4.556352 |
| H  | 2.893814  | 1.533046  | -3.118019 |
| H  | -0.842499 | 0.354528  | -3.446334 |

|   |           |           |           |
|---|-----------|-----------|-----------|
| H | 1.258709  | 1.808198  | -3.762308 |
| H | -0.794952 | -1.410486 | -3.224014 |
| H | 0.048962  | -0.662845 | -4.612155 |
| H | 2.256046  | -1.727705 | 4.313815  |
| H | 3.375766  | -1.625261 | 2.933484  |
| H | 1.958183  | -2.686464 | 2.838916  |
| H | 2.329181  | 0.639303  | 4.556352  |
| H | 2.893814  | 1.533046  | 3.118019  |
| H | -0.842499 | 0.354528  | 3.446334  |
| H | 1.258709  | 1.808198  | 3.762308  |
| H | -0.794952 | -1.410486 | 3.224014  |
| H | 0.048962  | -0.662845 | 4.612155  |
| H | 2.468882  | 4.471552  | 0.000000  |
| H | 3.332856  | 3.198225  | -0.892124 |
| H | 3.332856  | 3.198225  | 0.892124  |
| H | 1.412776  | -5.002779 | 0.000000  |
| H | 2.537492  | -3.942961 | -0.889064 |
| H | 2.537492  | -3.942961 | 0.889064  |
| H | 0.325067  | 4.360144  | -1.186656 |
| H | 0.805932  | 3.092351  | -2.341395 |
| H | -0.733779 | 2.948412  | 1.456864  |
| H | -0.733779 | 2.948412  | -1.456864 |
| H | 0.805932  | 3.092351  | 2.341395  |
| H | 0.325067  | 4.360144  | 1.186656  |
| H | -0.625095 | -4.450273 | -1.186572 |
| H | -0.625095 | -4.450273 | 1.186572  |
| H | 0.021016  | -3.272203 | -2.352784 |
| H | -1.422385 | -2.867433 | 1.389998  |
| H | -1.422385 | -2.867433 | -1.389998 |
| H | 0.021016  | -3.272203 | 2.352784  |
| P | 3.733181  | -0.269947 | 0.000000  |
| C | 4.706769  | 0.506136  | 1.385699  |
| H | 4.518963  | 1.585003  | 1.430288  |
| H | 4.457470  | 0.064710  | 2.356455  |
| H | 5.776764  | 0.346350  | 1.194389  |
| H | 4.296715  | -2.504109 | 0.889449  |
| C | 4.576455  | -1.927797 | 0.000000  |
| H | 4.296715  | -2.504109 | -0.889449 |
| H | 5.665267  | -1.779920 | 0.000000  |
| H | 5.776764  | 0.346350  | -1.194389 |
| C | 4.706769  | 0.506136  | -1.385699 |
| H | 4.518963  | 1.585003  | -1.430288 |
| H | 4.457470  | 0.064710  | -2.356455 |

**[(PMe<sub>3</sub>)<sub>4</sub>Mo]**

**Energy = -266.87791945 eV**

|    |           |           |           |
|----|-----------|-----------|-----------|
| Mo | -0.001532 | -1.427178 | 0.000000  |
| P  | -0.001498 | -1.849279 | 2.396455  |
| C  | 1.390317  | -2.916912 | 3.064213  |
| P  | -0.001498 | -1.849279 | -2.396455 |
| C  | 1.390317  | -2.916912 | -3.064213 |

|   |           |           |           |
|---|-----------|-----------|-----------|
| P | -2.398898 | -1.009626 | 0.000000  |
| C | -3.763776 | -2.297891 | 0.000000  |
| P | 2.395034  | -1.004472 | 0.000000  |
| C | 3.762428  | -2.290073 | 0.000000  |
| C | -1.388114 | -2.925883 | -3.059954 |
| C | -0.006910 | -0.564009 | -3.763712 |
| C | -3.066723 | 0.062431  | 1.388292  |
| C | -3.066723 | 0.062431  | -1.388292 |
| C | 3.060174  | 0.069128  | 1.388366  |
| C | 3.060174  | 0.069128  | -1.388366 |
| C | -1.388114 | -2.925883 | 3.059954  |
| C | -0.006910 | -0.564009 | 3.763712  |
| H | 1.239046  | -3.163748 | 4.126147  |
| H | 1.434178  | -3.850808 | 2.485759  |
| H | 2.355166  | -2.406275 | 2.952759  |
| H | -1.236425 | -3.175236 | 4.121237  |
| H | -1.427065 | -3.858217 | 2.478598  |
| H | -0.897346 | 0.071950  | 3.666455  |
| H | -2.355323 | -2.419537 | 2.949339  |
| H | 0.880792  | 0.076228  | 3.669167  |
| H | -0.007230 | -1.034552 | 4.759061  |
| H | 1.239046  | -3.163748 | -4.126147 |
| H | 1.434178  | -3.850808 | -2.485759 |
| H | 2.355166  | -2.406275 | -2.952759 |
| H | -1.236425 | -3.175236 | -4.121237 |
| H | -1.427065 | -3.858217 | -2.478598 |
| H | -0.897346 | 0.071950  | -3.666455 |
| H | -2.355323 | -2.419537 | -2.949339 |
| H | 0.880792  | 0.076228  | -3.669167 |
| H | -0.007230 | -1.034552 | -4.759061 |
| H | -4.759962 | -1.829183 | 0.000000  |
| H | -3.666576 | -2.935783 | 0.889061  |
| H | -3.666576 | -2.935783 | -0.889061 |
| H | 4.757712  | -1.819460 | 0.000000  |
| H | 3.666381  | -2.928166 | 0.889056  |
| H | 3.666381  | -2.928166 | -0.889056 |
| H | -4.130338 | 0.303537  | 1.239502  |
| H | -2.949292 | -0.441783 | 2.355728  |
| H | -2.492441 | 0.999303  | -1.424108 |
| H | -2.492441 | 0.999303  | 1.424108  |
| H | -2.949292 | -0.441783 | -2.355728 |
| H | -4.130338 | 0.303537  | -1.239502 |
| H | 4.123572  | 0.311713  | 1.240377  |
| H | 4.123572  | 0.311713  | -1.240377 |
| H | 2.942531  | -0.434667 | 2.355986  |
| H | 2.484583  | 1.005233  | -1.423097 |
| H | 2.484583  | 1.005233  | 1.423097  |
| H | 2.942531  | -0.434667 | -2.355986 |

**[(PMe<sub>3</sub>)<sub>4</sub>W]**

**Energy = -267.55377629 eV**

|   |           |           |           |
|---|-----------|-----------|-----------|
| W | -0.001680 | -1.108683 | 0.000000  |
| P | 0.000409  | -2.603793 | 1.771850  |
| C | 1.407576  | -3.812840 | 2.045363  |
| P | 0.000409  | -2.603793 | -1.771850 |
| C | 1.407576  | -3.812840 | -2.045363 |
| P | -2.309033 | -0.441177 | 0.000000  |
| C | -3.894943 | -1.441316 | 0.000000  |
| P | 2.305080  | -0.439732 | 0.000000  |
| C | 3.891783  | -1.438840 | 0.000000  |
| C | -1.402687 | -3.817697 | -2.044759 |
| C | -0.001577 | -1.843813 | -3.497008 |
| C | -2.756894 | 0.704822  | 1.421177  |
| C | -2.756894 | 0.704822  | -1.421177 |
| C | 2.752359  | 0.706462  | 1.421215  |
| C | 2.752359  | 0.706462  | -1.421215 |
| C | -1.402687 | -3.817697 | 2.044759  |
| C | -0.001577 | -1.843813 | 3.497008  |
| H | 1.246646  | -4.423270 | 2.947345  |
| H | 1.497653  | -4.477383 | 1.175661  |
| H | 2.349513  | -3.257741 | 2.150254  |
| H | -1.239680 | -4.428098 | 2.946402  |
| H | -1.490620 | -4.482067 | 1.174699  |
| H | -0.893616 | -1.215039 | 3.626999  |
| H | -2.346437 | -3.265758 | 2.150036  |
| H | 0.888233  | -1.212095 | 3.627950  |
| H | -0.000766 | -2.620958 | 4.275857  |
| H | 1.246646  | -4.423270 | -2.947345 |
| H | 1.497653  | -4.477383 | -1.175661 |
| H | 2.349513  | -3.257741 | -2.150254 |
| H | -1.239680 | -4.428098 | -2.946402 |
| H | -1.490620 | -4.482067 | -1.174699 |
| H | -0.893616 | -1.215039 | -3.626999 |
| H | -2.346437 | -3.265758 | -2.150036 |
| H | 0.888233  | -1.212095 | -3.627950 |
| H | -0.000766 | -2.620958 | -4.275857 |
| H | -4.776358 | -0.781462 | 0.000000  |
| H | -3.927094 | -2.084701 | 0.888879  |
| H | -3.927094 | -2.084701 | -0.888879 |
| H | 4.772710  | -0.778337 | 0.000000  |
| H | 3.924471  | -2.082209 | 0.888866  |
| H | 3.924471  | -2.082209 | -0.888866 |
| H | -3.742249 | 1.168560  | 1.263326  |
| H | -2.778527 | 0.139269  | 2.362561  |
| H | -2.004061 | 1.500906  | -1.513540 |
| H | -2.004061 | 1.500906  | 1.513540  |
| H | -2.778527 | 0.139269  | -2.362561 |
| H | -3.742249 | 1.168560  | -1.263326 |
| H | 3.737508  | 1.170626  | 1.263353  |
| H | 3.737508  | 1.170626  | -1.263353 |
| H | 2.774315  | 0.140850  | 2.362549  |
| H | 1.999190  | 1.502217  | -1.513707 |
| H | 1.999190  | 1.502217  | 1.513707  |

|   |          |          |           |
|---|----------|----------|-----------|
| H | 2.774315 | 0.140850 | -2.362549 |
|---|----------|----------|-----------|

**[(PMe<sub>3</sub>)<sub>5</sub>Mo]**

|    |           |           |           |
|----|-----------|-----------|-----------|
| Mo | 1.437790  | -0.362634 | 0.000000  |
| P  | 1.579737  | -0.313714 | -2.457159 |
| C  | 2.750830  | -1.528074 | -3.286209 |
| P  | 1.579737  | -0.313714 | 2.457159  |
| C  | 2.750830  | -1.528074 | 3.286209  |
| P  | 0.179881  | 1.610846  | 0.000000  |
| C  | 1.073392  | 3.259677  | 0.000000  |
| P  | -0.385563 | -1.964187 | 0.000000  |
| C  | 0.322246  | -3.705508 | 0.000000  |
| C  | 2.161772  | 1.265313  | 3.284266  |
| C  | 0.185109  | -0.621194 | 3.682718  |
| C  | -1.042094 | 1.979647  | -1.376207 |
| C  | -1.042094 | 1.979647  | 1.376207  |
| C  | -1.638147 | -2.223373 | -1.373128 |
| C  | -1.638147 | -2.223373 | 1.373128  |
| C  | 2.161772  | 1.265313  | -3.284266 |
| C  | 0.185109  | -0.621194 | -3.682718 |
| H  | 2.735114  | -1.406510 | -4.379521 |
| H  | 3.781358  | -1.398913 | -2.933860 |
| H  | 2.433089  | -2.552236 | -3.042743 |
| H  | 2.484067  | 1.070850  | -4.318509 |
| H  | 2.978554  | 1.731789  | -2.726762 |
| H  | -0.732443 | -0.100134 | -3.386924 |
| H  | 1.323744  | 1.974366  | -3.311990 |
| H  | -0.027938 | -1.694781 | -3.750274 |
| H  | 0.492632  | -0.272611 | -4.679410 |
| H  | 2.735114  | -1.406510 | 4.379521  |
| H  | 3.781358  | -1.398913 | 2.933860  |
| H  | 2.433089  | -2.552236 | 3.042743  |
| H  | 2.484067  | 1.070850  | 4.318509  |
| H  | 2.978554  | 1.731789  | 2.726762  |
| H  | -0.732443 | -0.100134 | 3.386924  |
| H  | 1.323744  | 1.974366  | 3.311990  |
| H  | -0.027938 | -1.694781 | 3.750274  |
| H  | 0.492632  | -0.272611 | 4.679410  |
| H  | 0.381329  | 4.116724  | 0.000000  |
| H  | 1.716824  | 3.314167  | -0.889321 |
| H  | 1.716824  | 3.314167  | 0.889321  |
| H  | -0.477046 | -4.462316 | 0.000000  |
| H  | 0.948146  | -3.854128 | -0.891376 |
| H  | 0.948146  | -3.854128 | 0.891376  |
| H  | -1.552188 | 2.939692  | -1.206465 |
| H  | -0.539408 | 2.017809  | -2.350437 |
| H  | -1.794118 | 1.178770  | 1.408369  |
| H  | -1.794118 | 1.178770  | -1.408369 |
| H  | -0.539408 | 2.017809  | 2.350437  |
| H  | -1.552188 | 2.939692  | 1.206465  |
| H  | -2.311656 | -3.055337 | -1.121664 |

|   |           |           |           |
|---|-----------|-----------|-----------|
| H | -2.311656 | -3.055337 | 1.121664  |
| H | -1.136784 | -2.450994 | -2.318929 |
| H | -2.237379 | -1.313187 | 1.512650  |
| H | -2.237379 | -1.313187 | -1.512650 |
| H | -1.136784 | -2.450994 | 2.318929  |
| P | 3.867239  | 0.126169  | 0.000000  |
| C | 4.950714  | 0.848679  | 1.359020  |
| H | 4.825096  | 1.940221  | 1.384588  |
| H | 4.697262  | 0.448634  | 2.346837  |
| H | 6.006867  | 0.625742  | 1.148728  |
| H | 4.279968  | -2.160024 | 0.889888  |
| C | 4.603803  | -1.604923 | 0.000000  |
| H | 4.279968  | -2.160024 | -0.889888 |
| H | 5.702470  | -1.552311 | 0.000000  |
| H | 6.006867  | 0.625742  | -1.148728 |
| C | 4.950714  | 0.848679  | -1.359020 |
| H | 4.825096  | 1.940221  | -1.384588 |
| H | 4.697262  | 0.448634  | -2.346837 |

**[(PMe<sub>3</sub>)<sub>5</sub>W]**

|   |           |           |           |
|---|-----------|-----------|-----------|
| W | 1.437269  | -0.356065 | 0.000000  |
| P | 1.572316  | -0.311122 | -2.459459 |
| C | 2.731553  | -1.531138 | -3.305099 |
| P | 1.572316  | -0.311122 | 2.459459  |
| C | 2.731553  | -1.531138 | 3.305099  |
| P | 0.184348  | 1.627886  | 0.000000  |
| C | 1.081437  | 3.280109  | 0.000000  |
| P | -0.367920 | -1.986136 | 0.000000  |
| C | 0.332965  | -3.734538 | 0.000000  |
| C | 2.154303  | 1.260551  | 3.311974  |
| C | 0.164530  | -0.614121 | 3.677971  |
| C | -1.034695 | 2.022037  | -1.376553 |
| C | -1.034695 | 2.022037  | 1.376553  |
| C | -1.624211 | -2.259520 | -1.372860 |
| C | -1.624211 | -2.259520 | 1.372860  |
| C | 2.154303  | 1.260551  | -3.311974 |
| C | 0.164530  | -0.614121 | -3.677971 |
| H | 2.709797  | -1.405539 | -4.397860 |
| H | 3.765205  | -1.408557 | -2.958832 |
| H | 2.410620  | -2.554663 | -3.063615 |
| H | 2.459852  | 1.053086  | -4.348728 |
| H | 2.982884  | 1.727790  | -2.772447 |
| H | -0.748207 | -0.090359 | -3.372398 |
| H | 1.321265  | 1.975569  | -3.335334 |
| H | -0.052883 | -1.686301 | -3.747444 |
| H | 0.463644  | -0.263073 | -4.676320 |
| H | 2.709797  | -1.405539 | 4.397860  |
| H | 3.765205  | -1.408557 | 2.958832  |
| H | 2.410620  | -2.554663 | 3.063615  |
| H | 2.459852  | 1.053086  | 4.348728  |
| H | 2.982884  | 1.727790  | 2.772447  |

|   |           |           |           |
|---|-----------|-----------|-----------|
| H | -0.748207 | -0.090359 | 3.372398  |
| H | 1.321265  | 1.975569  | 3.335334  |
| H | -0.052883 | -1.686301 | 3.747444  |
| H | 0.463644  | -0.263073 | 4.676320  |
| H | 0.391387  | 4.138975  | 0.000000  |
| H | 1.724768  | 3.333358  | -0.889336 |
| H | 1.724768  | 3.333358  | 0.889336  |
| H | -0.471745 | -4.485344 | 0.000000  |
| H | 0.957631  | -3.888515 | -0.891254 |
| H | 0.957631  | -3.888515 | 0.891254  |
| H | -1.528498 | 2.989710  | -1.201911 |
| H | -0.529698 | 2.059427  | -2.349667 |
| H | -1.800507 | 1.234742  | 1.415164  |
| H | -1.800507 | 1.234742  | -1.415164 |
| H | -0.529698 | 2.059427  | 2.349667  |
| H | -1.528498 | 2.989710  | 1.201911  |
| H | -2.294870 | -3.091487 | -1.113859 |
| H | -2.294870 | -3.091487 | 1.113859  |
| H | -1.122474 | -2.496498 | -2.316373 |
| H | -2.225547 | -1.352259 | 1.520807  |
| H | -2.225547 | -1.352259 | -1.520807 |
| H | -1.122474 | -2.496498 | 2.316373  |
| P | 3.866316  | 0.108712  | 0.000000  |
| C | 4.945538  | 0.845495  | 1.359144  |
| H | 4.806464  | 1.935219  | 1.384910  |
| H | 4.697016  | 0.441085  | 2.346449  |
| H | 6.004091  | 0.635199  | 1.147957  |
| H | 4.326768  | -2.172119 | 0.890292  |
| C | 4.638478  | -1.610486 | 0.000000  |
| H | 4.326768  | -2.172119 | -0.890292 |
| H | 5.735586  | -1.533199 | 0.000000  |
| H | 6.004091  | 0.635199  | -1.147957 |
| C | 4.945538  | 0.845495  | -1.359144 |
| H | 4.806464  | 1.935219  | -1.384910 |
| H | 4.697016  | 0.441085  | -2.346449 |

**Si(Mes)]<sup>+</sup>**

**Energy = -116.16140127 eV**

|    |           |          |           |
|----|-----------|----------|-----------|
| C  | -0.000161 | 3.069182 | 0.000000  |
| C  | 0.005724  | 3.772704 | 1.242381  |
| C  | 0.013798  | 5.156314 | 1.220339  |
| C  | 0.013534  | 5.866893 | 0.000000  |
| C  | 0.013798  | 5.156314 | -1.220339 |
| C  | 0.005724  | 3.772704 | -1.242381 |
| C  | 0.006405  | 2.987756 | 2.530481  |
| C  | -0.014936 | 7.364093 | 0.000000  |
| C  | 0.006405  | 2.987756 | -2.530481 |
| Si | -0.008535 | 1.267398 | 0.000000  |
| H  | 0.023307  | 5.717295 | 2.156897  |
| H  | 0.023307  | 5.717295 | -2.156897 |



|   |           |          |           |
|---|-----------|----------|-----------|
| H | 0.004864  | 1.889387 | -2.351916 |
| H | -0.881738 | 3.199474 | -3.140414 |
| H | 0.895850  | 3.197663 | -3.139115 |
| H | -1.061602 | 7.711824 | 0.000000  |
| H | 0.461939  | 7.780647 | -0.894513 |
| H | 0.461939  | 7.780647 | 0.894513  |
| H | 0.004864  | 1.889387 | 2.351916  |
| H | 0.895850  | 3.197663 | 3.139115  |
| H | -0.881738 | 3.199474 | 3.140414  |

### **Ge(Mes)]<sup>+</sup>**

**Energy = -115.72751137 eV**

|    |           |          |           |
|----|-----------|----------|-----------|
| C  | 0.000649  | 3.059959 | 0.000000  |
| C  | 0.006054  | 3.761949 | 1.240208  |
| C  | 0.018017  | 5.147372 | 1.218303  |
| C  | 0.020788  | 5.860220 | 0.000000  |
| C  | 0.018017  | 5.147372 | -1.218303 |
| C  | 0.006054  | 3.761949 | -1.240208 |
| C  | 0.001646  | 2.989931 | 2.536349  |
| C  | 0.000434  | 7.358423 | 0.000000  |
| C  | 0.001646  | 2.989931 | -2.536349 |
| Ge | -0.004672 | 1.158419 | 0.000000  |
| H  | 0.028545  | 5.706777 | 2.156127  |
| H  | 0.028545  | 5.706777 | -2.156127 |
| H  | -0.000327 | 1.890411 | -2.372432 |
| H  | -0.887736 | 3.211298 | -3.141363 |
| H  | 0.888633  | 3.207922 | -3.145985 |
| H  | -1.043380 | 7.714375 | 0.000000  |
| H  | 0.480564  | 7.772654 | -0.894067 |
| H  | 0.480564  | 7.772654 | 0.894067  |
| H  | -0.000327 | 1.890411 | 2.372432  |
| H  | 0.888633  | 3.207922 | 3.145985  |
| H  | -0.887736 | 3.211298 | 3.141363  |

### **Sn(Mes)]<sup>+</sup>**

**Energy = -115.29087081 eV**

|    |           |          |           |
|----|-----------|----------|-----------|
| C  | -0.000413 | 3.420497 | 0.000000  |
| C  | 0.005013  | 4.121422 | 1.234811  |
| C  | 0.015074  | 5.509954 | 1.215249  |
| C  | 0.015260  | 6.223873 | 0.000000  |
| C  | 0.015074  | 5.509954 | -1.215249 |
| C  | 0.005013  | 4.121422 | -1.234811 |
| C  | 0.002155  | 3.366946 | 2.542828  |
| C  | -0.008735 | 7.723503 | 0.000000  |
| C  | 0.002155  | 3.366946 | -2.542828 |
| Sn | -0.002827 | 1.309967 | 0.000000  |
| H  | 0.025837  | 6.067676 | 2.154244  |
| H  | 0.025837  | 6.067676 | -2.154244 |
| H  | 0.000879  | 2.263734 | -2.399893 |
| H  | -0.886930 | 3.593072 | -3.146381 |
| H  | 0.889149  | 3.591338 | -3.149979 |

|   |           |          |           |
|---|-----------|----------|-----------|
| H | -1.051942 | 8.079644 | 0.000000  |
| H | 0.473152  | 8.137379 | -0.893286 |
| H | 0.473152  | 8.137379 | 0.893286  |
| H | 0.000879  | 2.263734 | 2.399893  |
| H | 0.889149  | 3.591338 | 3.149979  |
| H | -0.886930 | 3.593072 | 3.146381  |

**[Pb(Mes)]<sup>+</sup>**

**Energy = -115.15204883 eV**

|    |           |          |           |
|----|-----------|----------|-----------|
| C  | -0.003009 | 3.565673 | 0.000000  |
| C  | 0.004335  | 4.265338 | 1.232030  |
| C  | 0.014586  | 5.655778 | 1.212749  |
| C  | 0.015387  | 6.370793 | 0.000000  |
| C  | 0.014586  | 5.655778 | -1.212749 |
| C  | 0.004335  | 4.265338 | -1.232030 |
| C  | 0.003077  | 3.524003 | 2.548026  |
| C  | -0.008376 | 7.871580 | 0.000000  |
| C  | 0.003077  | 3.524003 | -2.548026 |
| Pb | -0.000028 | 1.360152 | 0.000000  |
| H  | 0.025017  | 6.212364 | 2.152514  |
| H  | 0.025017  | 6.212364 | -2.152514 |
| H  | 0.009227  | 2.420283 | -2.420533 |
| H  | -0.888483 | 3.753000 | -3.146817 |
| H  | 0.886252  | 3.762614 | -3.155285 |
| H  | -1.050476 | 8.229977 | 0.000000  |
| H  | 0.475258  | 8.284742 | -0.892728 |
| H  | 0.475258  | 8.284742 | 0.892728  |
| H  | 0.009227  | 2.420283 | 2.420533  |
| H  | 0.886252  | 3.762614 | 3.155285  |
| H  | -0.888483 | 3.753000 | 3.146817  |
